# Supplementary material for: Exploring π–π interactions and electron transport in complexes involving a hexacationic host and PAH guest: a promising avenue for molecular devices
Source: Royal Society of Chemistry journal article supplement (doi:10.1039/d3cp03389a), 2023-01-01
Supplement: d3cp03389a1.pdf [file d3cp03389a1.pdf]

## **Supporting Information**

# **Exploring $\pi$ - $\pi$ Interactions and Electron Transport in Complexes Involving Hexacationic Host and PAH Guest: A Promising Avenue for Molecular Devices**

Haobam Kisan Singh, Upasana Nath, Niharika Keot, and Manabendra Sarma\*

Department of Chemistry, Indian Institute of Technology Guwahati, North-Guwahati,

Guwahati-781039, India

## Table of Contents

| S. No |                                                                                                                                                                             | Page No.      |
|-------|-----------------------------------------------------------------------------------------------------------------------------------------------------------------------------|---------------|
| 1     | <b>Figure S1.</b> Centroids distances of Host ( <b>H</b> ) in complexes <b>G1cH</b> to <b>G7cH</b> calculated at the PBE0-D3BJ/def2-TZVP level of theory.                   | <b>S1</b>     |
| 2     | <b>Figure S2.</b> Distances between host and guest in complexes <b>G1cH-G7cH</b> , calculated at the PBE0-D3BJ/def2-TZVP level of theory.                                   | <b>S1</b>     |
| 3     | <b>Table S1.</b> Interaction energy, $\Delta E$ (kcal mol <sup>-1</sup> ), of host-guest complexes <b>G1cH-G7cH</b> , calculated at the PBEh-3c/ def2-mSVP level of theory. | <b>S2</b>     |
| 4     | <b>Figure S3.</b> Ab <i>initio</i> molecular dynamics simulation of complex ( <b>G1cH</b> ) calculated at the B97-3c/def2-mTZVP level of theory.                            | <b>S2</b>     |
| 5     | <b>Figure S4.</b> Ab <i>initio</i> molecular dynamics simulation of complex ( <b>G2cH</b> ) calculated at the B97-3c/def2-mTZVP level of theory.                            | <b>S3</b>     |
| 6     | <b>Figure S5.</b> Ab <i>initio</i> molecular dynamics simulation of complex ( <b>G3cH</b> ) calculated at the B97-3c/def2-mTZVP level of theory.                            | <b>S3</b>     |
| 7     | <b>Figure S6.</b> Ab <i>initio</i> molecular dynamics simulation of complex ( <b>G4cH</b> ) calculated at the B97-3c/def2-mTZVP level of theory.                            | <b>S4</b>     |
| 8     | <b>Figure S7.</b> Ab <i>initio</i> molecular dynamics simulation of complex ( <b>G5cH</b> ) calculated at the B97-3c/def2-mTZVP level of theory.                            | <b>S4</b>     |
| 9     | <b>Figure S8.</b> Ab <i>initio</i> molecular dynamics simulation of complex ( <b>G6cH</b> ) calculated at the B97-3c/def2-mTZVP level of theory.                            | <b>S5</b>     |
| 10    | <b>Figure S9:</b> I-V plot of host and host-guest complexes at the reverse and forward bias.                                                                                | <b>S5</b>     |
| 11    | <b>Table S2.</b> Conductance value and R <sup>2</sup> values of the host and host-guest complexes.                                                                          | <b>S6</b>     |
| 12    | <b>Figure S10:</b> Transmission spectra of the host ( <b>H</b> ) at voltage -1.0 eV to +1.0 eV.                                                                             | <b>S6</b>     |
| 13    | Optimized coordinates of the host ( <b>H</b> ) and host-guest complexes <b>G1cH-G7cH</b> calculated at the PBE0-D3BJ/def2-TZVP level of theory.                             | <b>S6-S30</b> |

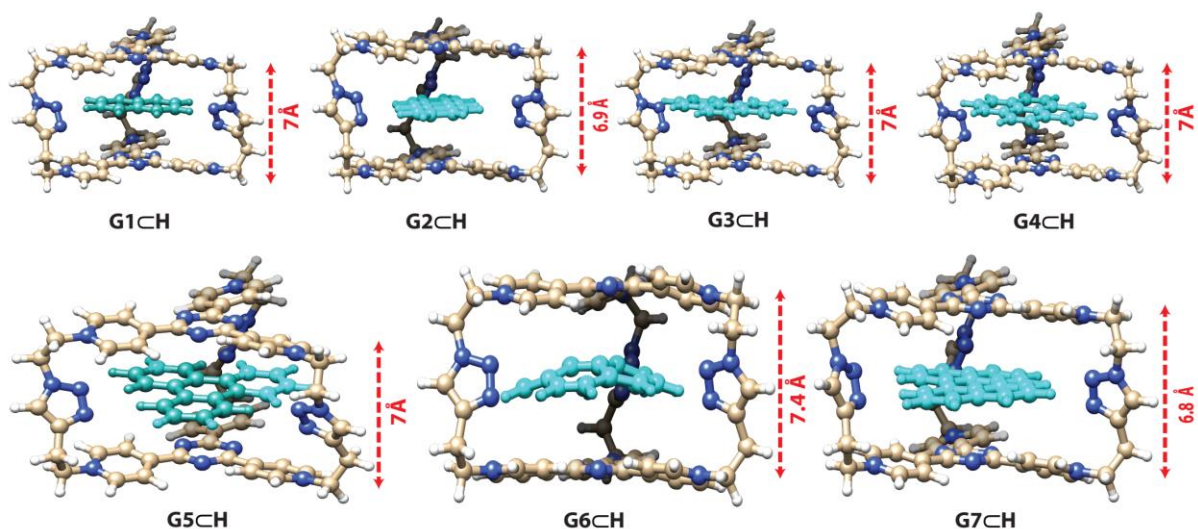

**Figure S1.** Centroids distances of Host (**H**) in complexes **G1cH** to **G7cH** calculated at the PBE0-D3BJ/def2-TZVP level of theory.

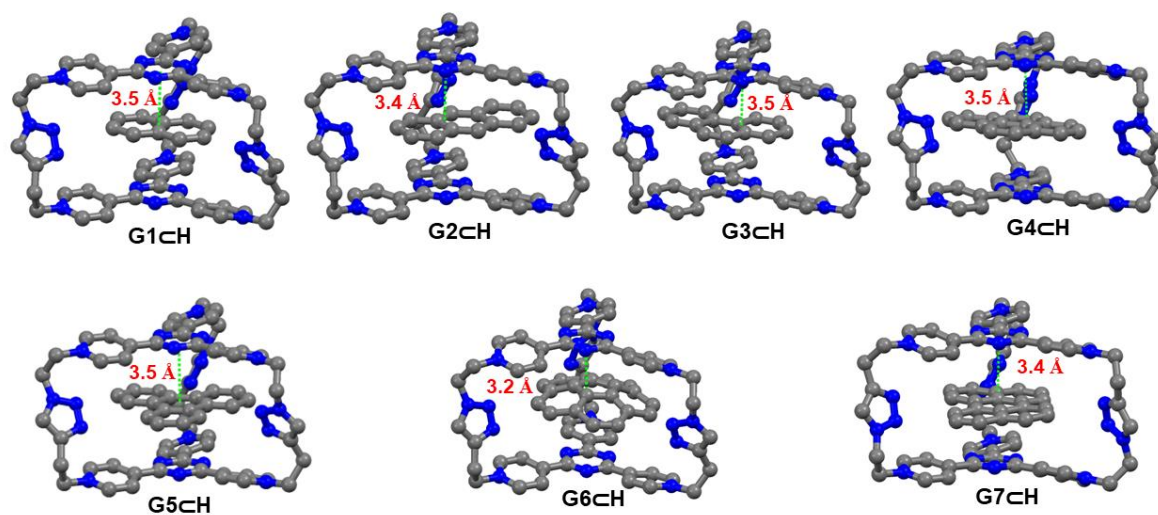

**Figure S2.** Distances between host and guest in complexes **G1cH**-**G7cH**, calculated at the PBE0-D3BJ/def2-TZVP level of theory.

**Table S1.** Interaction energy,  $\Delta E$  (kcal mol<sup>-1</sup>), of host-guest complexes **G1cH**-**G7cH**, calculated at the PBEh-3c/ def2-mSVP level of theory.

| Complexes   | $\Delta E$ |
|-------------|------------|
| <b>G1cH</b> | -34.02     |
| <b>G2cH</b> | -44.02     |
| <b>G3cH</b> | -50.42     |
| <b>G4cH</b> | -43.14     |
| <b>G5cH</b> | -43.38     |
| <b>G6cH</b> | -41.00     |
| <b>G7cH</b> | -51.96     |

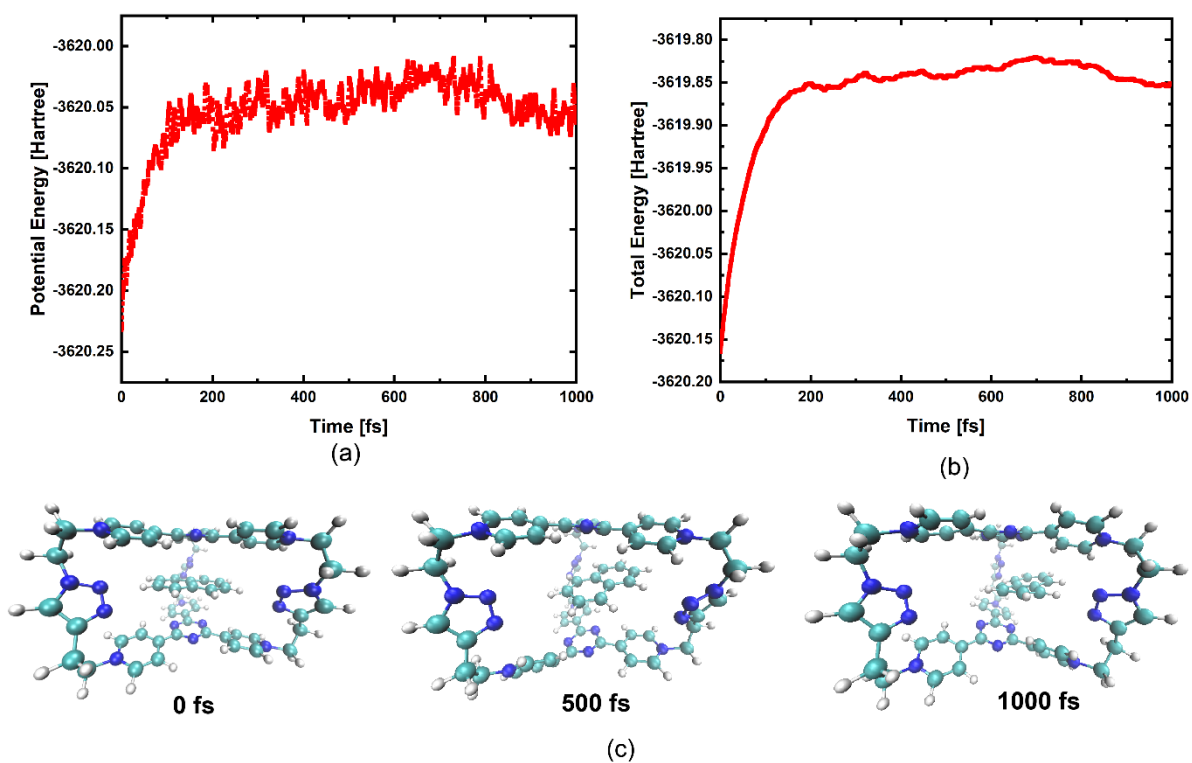

**Figure S3.** Ab *initio* molecular dynamics simulation of complex (**G1cH**) calculated at the B97-3c/def2-mTZVP level of theory.

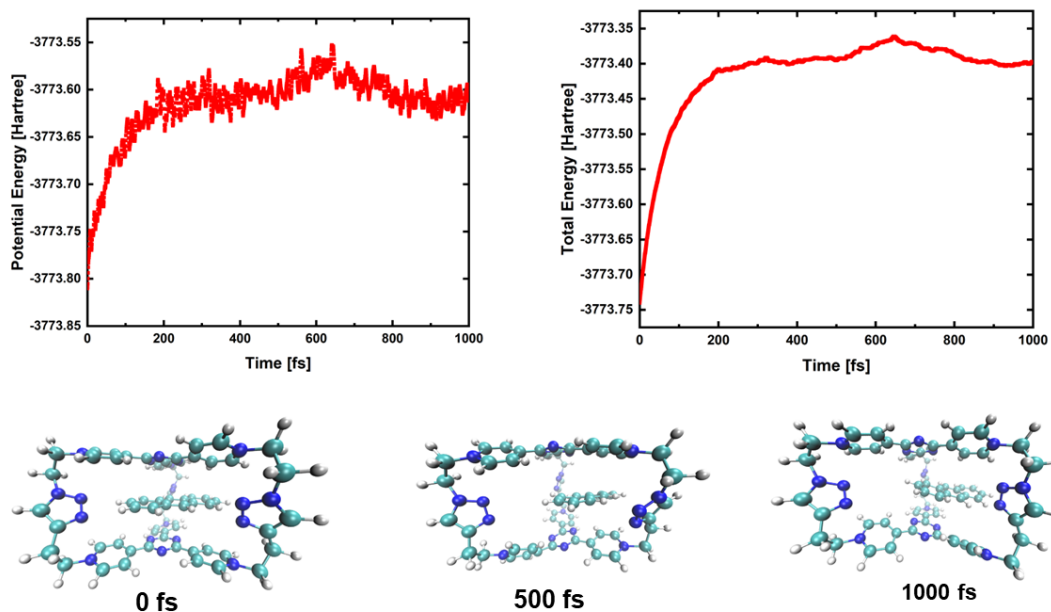

**Figure S4.** *Ab initio* molecular dynamics simulation of complex (**G2cH**) calculated at the B97-3c/def2-mTZVP level of theory.

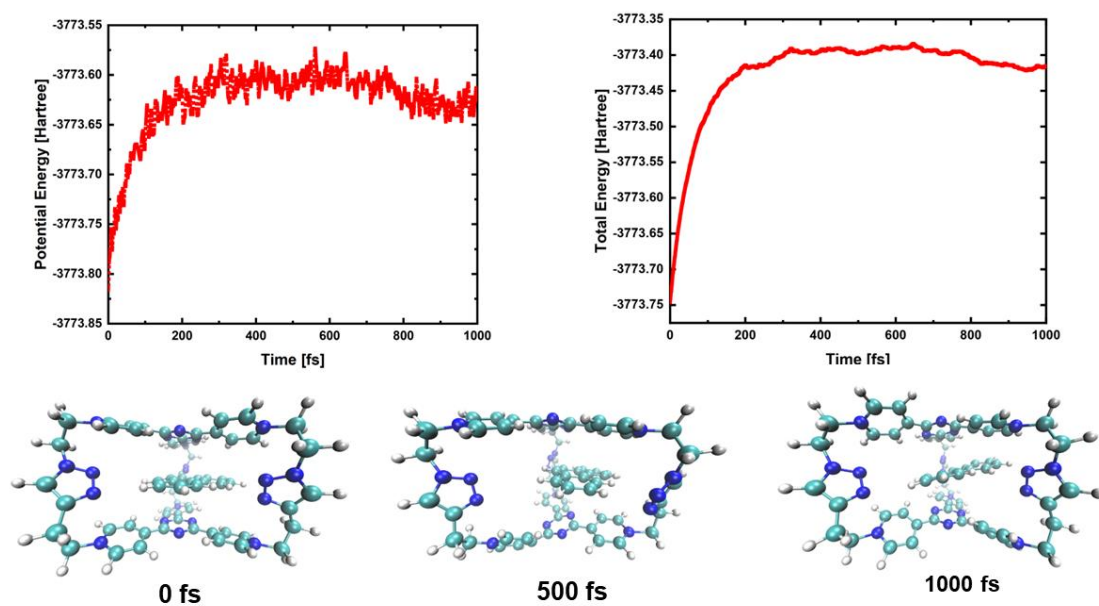

**Figure S5.** *Ab initio* molecular dynamics simulation of complex (**G3cH**) calculated at the B97-3c/def2-mTZVP level of theory.

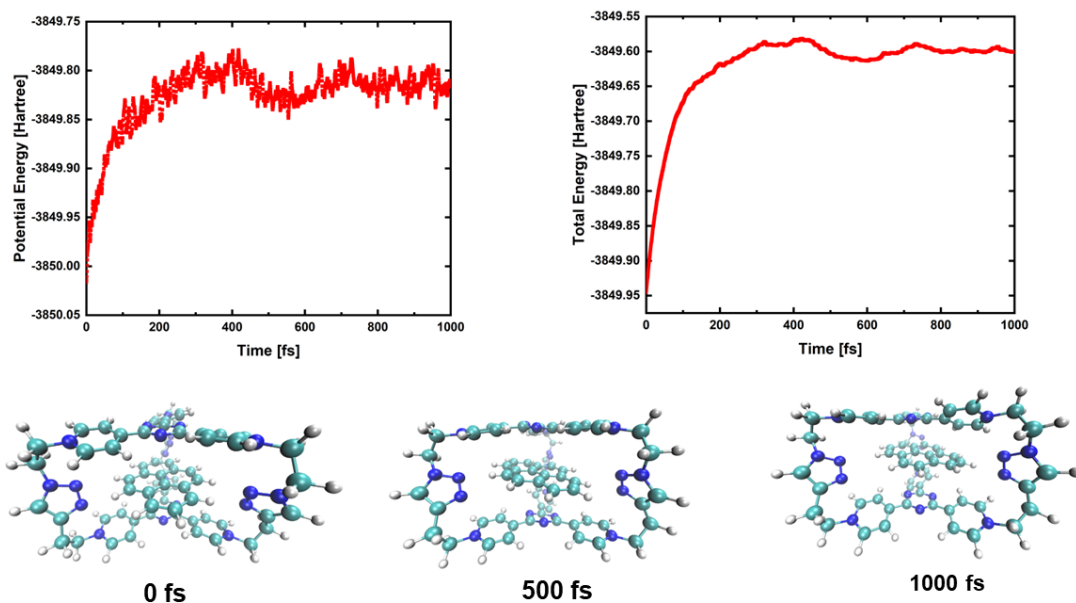

**Figure S6.** *Ab initio* molecular dynamics simulation of complex (G4cH) calculated at the B97-3c/def2-mTZVP level of theory.

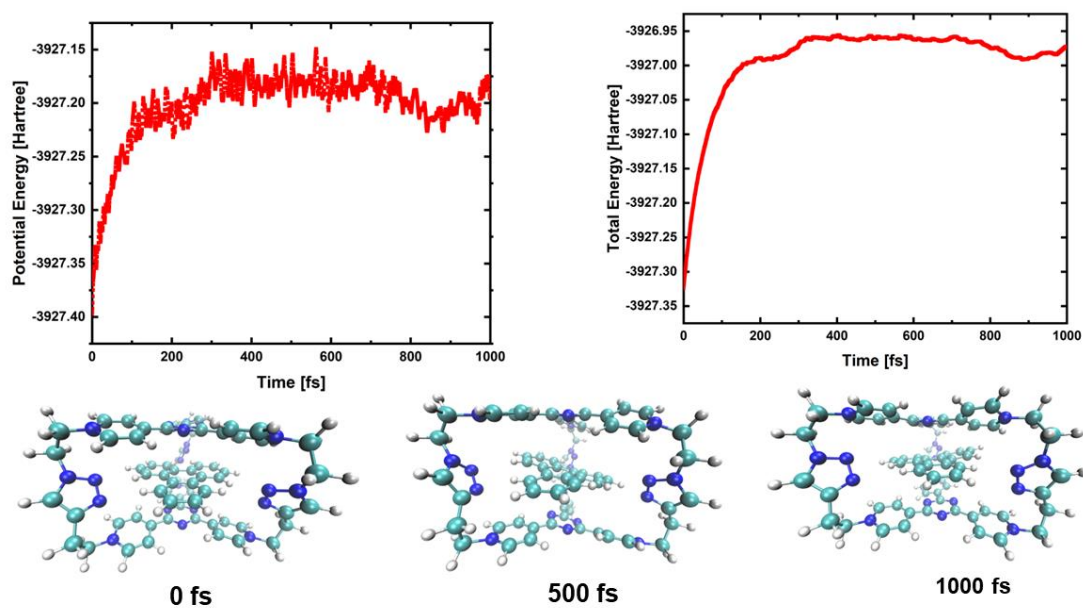

**Figure S7.** *Ab initio* molecular dynamics simulation of complex (G5cH) calculated at the B97-3c/def2-mTZVP level of theory.

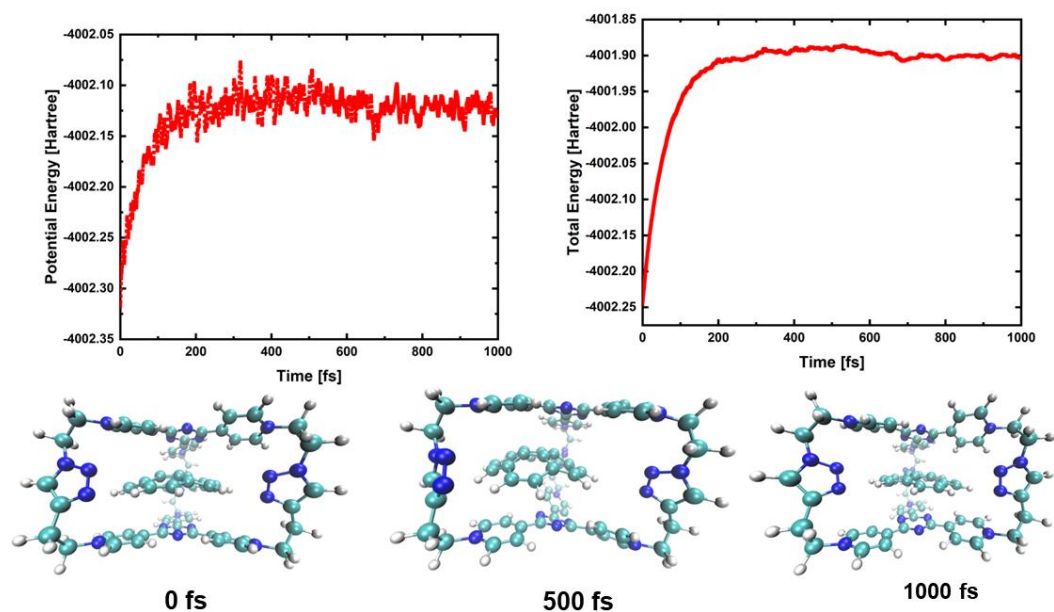

**Figure S8.** *Ab initio* molecular dynamics simulation of complex (G6cH) calculated at the B97-3c/def2-mTZVP level of theory.

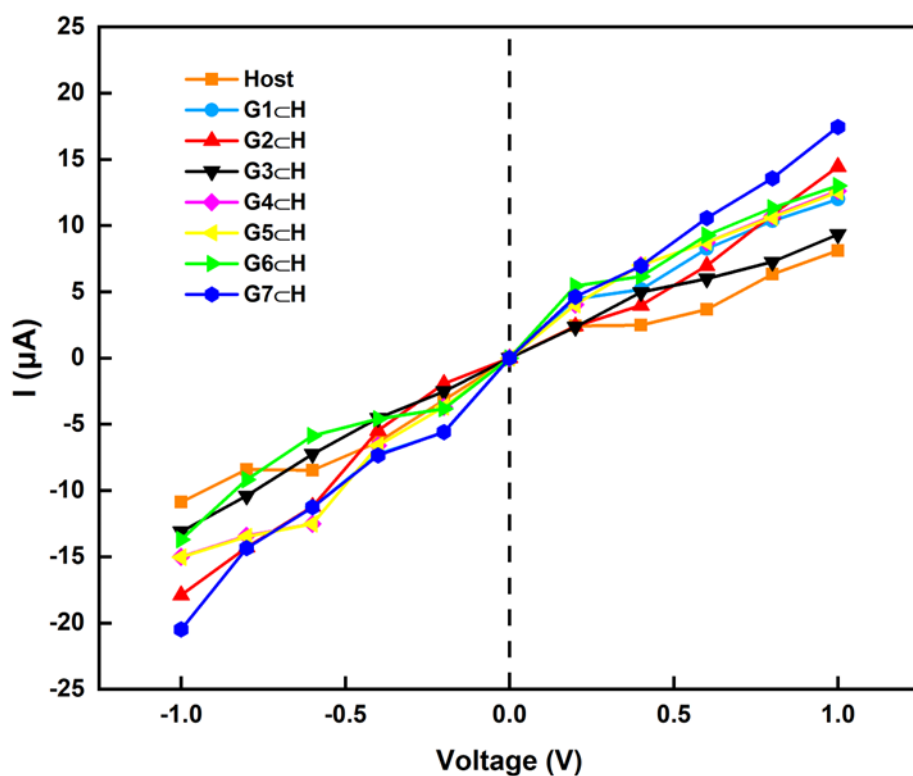

**Figure S9:** I-V plot of host and host-guest complexes at the reverse and forward bias.



**Table S2.** Conductance value and  $R^2$  values of the host and host-guest complexes.

| Complexes   | Conductance (S)* $10^{-5}$ | $R^2$ -value |
|-------------|----------------------------|--------------|
| <b>H</b>    | 0.97                       | 0.97         |
| <b>G1cH</b> | 1.61                       | 0.97         |
| <b>G2cH</b> | 1.54                       | 0.98         |
| <b>G3cH</b> | 1.11                       | 0.98         |
| <b>G4cH</b> | 1.52                       | 0.98         |
| <b>G5cH</b> | 1.51                       | 0.98         |
| <b>G6cH</b> | 1.32                       | 0.98         |
| <b>G7cH</b> | 1.84                       | 0.99         |

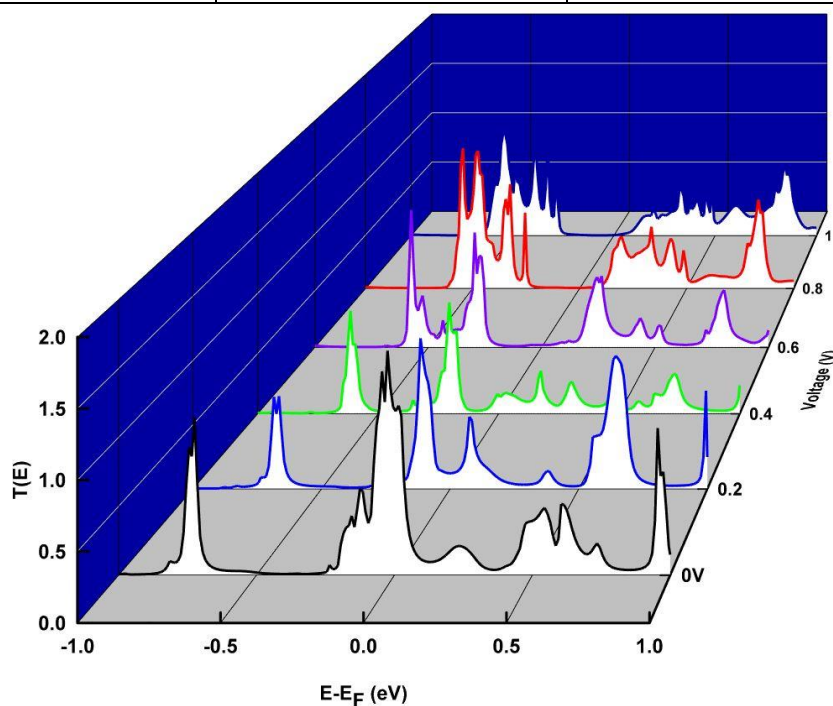

**Figure S10:** Transmission spectra of the host (**H**) at voltage -1.0 eV to +1.0 eV.

**Optimized coordinates** of the host (**H**) and host-guest complexes **G1cH-G7cH** calculated at the PBE0-D3BJ/def2-TZVP level of theory.

**HOST (H) [+6]**

```

N      -4.77400000  2.32400000 -4.80700000
N      -0.38600000 -0.02100000 -5.16000000
N      1.88500000  0.59700000 -5.17400000
N      2.04600000 -4.38600000 -5.04900000
C      -4.43700000  1.09800000 -5.23900000
H      -5.25300000  0.43100000 -5.48700000
C      -3.11800000  0.73000000 -5.36200000

```



|   |             |             |             |
|---|-------------|-------------|-------------|
| H | -2.87300000 | -0.26300000 | -5.71300000 |
| C | -2.12000000 | 1.65000000  | -5.05000000 |
| C | -0.68400000 | 1.27500000  | -5.12700000 |
| C | 0.91200000  | -0.30900000 | -5.18400000 |
| C | 1.30400000  | -1.74200000 | -5.17200000 |
| C | 0.38900000  | -2.72000000 | -4.80700000 |
| H | -0.63300000 | -2.46300000 | -4.56400000 |
| C | 0.79200000  | -4.03500000 | -4.74000000 |
| H | 0.12500000  | -4.83400000 | -4.44600000 |
| C | 2.93900000  | -3.46300000 | -5.44100000 |
| H | 3.92400000  | -3.82500000 | -5.70700000 |
| C | 2.59900000  | -2.13200000 | -5.50300000 |
| H | 3.33600000  | -1.40800000 | -5.82400000 |
| N | -4.55200000 | 2.57900000  | 2.52600000  |
| N | -0.35400000 | -0.13400000 | 2.66500000  |
| N | 1.95600000  | 0.31900000  | 2.64800000  |
| N | 1.70400000  | -4.66200000 | 2.27900000  |
| C | -4.27500000 | 1.31500000  | 2.18100000  |
| H | -5.10600000 | 0.71000000  | 1.84600000  |
| C | -2.99000000 | 0.82600000  | 2.26200000  |
| H | -2.79400000 | -0.20100000 | 1.98800000  |
| C | -1.96300000 | 1.66500000  | 2.67700000  |
| C | -0.55700000 | 1.18000000  | 2.69900000  |
| C | 0.91900000  | -0.51500000 | 2.64100000  |
| C | 1.20200000  | -1.97200000 | 2.55200000  |
| C | 0.22600000  | -2.91200000 | 2.87400000  |
| H | -0.74400000 | -2.60900000 | 3.24400000  |
| C | 0.50900000  | -4.25200000 | 2.73700000  |
| H | -0.20500000 | -5.02400000 | 2.99400000  |
| C | 2.66200000  | -3.77500000 | 1.97800000  |
| H | 3.60200000  | -4.17700000 | 1.62700000  |
| C | 2.44300000  | -2.42300000 | 2.12000000  |
| H | 3.23600000  | -1.72800000 | 1.88200000  |
| N | 0.21500000  | 2.25400000  | -5.11500000 |
| N | 4.45000000  | 4.87600000  | -4.86200000 |
| C | -3.83100000 | 3.22900000  | -4.51600000 |
| H | -4.17700000 | 4.19900000  | -4.18700000 |
| C | -2.49500000 | 2.92400000  | -4.64300000 |
| H | -1.75200000 | 3.67500000  | -4.41400000 |
| C | 1.48600000  | 1.86500000  | -5.14100000 |
| C | 2.53100000  | 2.91900000  | -5.07900000 |
| C | 2.22200000  | 4.25000000  | -5.34800000 |
| H | 1.22700000  | 4.54200000  | -5.65600000 |
| C | 3.20500000  | 5.20600000  | -5.24000000 |
| H | 3.02600000  | 6.25100000  | -5.45700000 |
| C | 4.77300000  | 3.60100000  | -4.61300000 |
| H | 5.79800000  | 3.40900000  | -4.32700000 |
| C | 3.83600000  | 2.59900000  | -4.72800000 |
| H | 4.12400000  | 1.57500000  | -4.53300000 |
| N | 0.40900000  | 2.09200000  | 2.70900000  |
| N | 4.85000000  | 4.37800000  | 2.45100000  |

|   |             |             |             |
|---|-------------|-------------|-------------|
| C | -3.58300000 | 3.39700000  | 2.97000000  |
| H | -3.88500000 | 4.39400000  | 3.26500000  |
| C | -2.27700000 | 2.97100000  | 3.04500000  |
| H | -1.51600000 | 3.65000000  | 3.40400000  |
| C | 1.64900000  | 1.61200000  | 2.68200000  |
| C | 2.77000000  | 2.58800000  | 2.64000000  |
| C | 2.54100000  | 3.90700000  | 2.26800000  |
| H | 1.54300000  | 4.25700000  | 2.04300000  |
| C | 3.60300000  | 4.77700000  | 2.16700000  |
| H | 3.48100000  | 5.80800000  | 1.86200000  |
| C | 5.09100000  | 3.11800000  | 2.85300000  |
| H | 6.11600000  | 2.87400000  | 3.10100000  |
| C | 4.07200000  | 2.19900000  | 2.94600000  |
| H | 4.29400000  | 1.19100000  | 3.27000000  |
| C | 6.40100000  | 6.24400000  | -1.14000000 |
| H | 7.19500000  | 6.96800000  | -1.03700000 |
| C | 5.47900000  | 6.01200000  | -2.13300000 |
| N | 5.10700000  | 4.54000000  | -0.58600000 |
| N | 4.71000000  | 4.96100000  | -1.74400000 |
| N | 6.12700000  | 5.31400000  | -0.20500000 |
| C | 5.25500000  | 6.75100000  | -3.40700000 |
| H | 4.25200000  | 7.18900000  | -3.40900000 |
| H | 5.94800000  | 7.59300000  | -3.46400000 |
| C | 6.81400000  | 5.04800000  | 1.04100000  |
| H | 7.17400000  | 4.01800000  | 1.02800000  |
| C | 5.46100000  | 5.94500000  | -4.68900000 |
| H | 5.38500000  | 6.60000000  | -5.55800000 |
| H | 6.44000000  | 5.47000000  | -4.71100000 |
| C | 5.97900000  | 5.31900000  | 2.28800000  |
| H | 6.61700000  | 5.22500000  | 3.16800000  |
| H | 5.56800000  | 6.32800000  | 2.27900000  |
| H | 7.68900000  | 5.69700000  | 1.09000000  |
| C | -6.27600000 | 2.52200000  | -2.06800000 |
| N | -4.81700000 | 2.86300000  | -0.50200000 |
| N | -4.98200000 | 2.36200000  | -1.68400000 |
| N | -5.99700000 | 3.34200000  | -0.09900000 |
| C | -6.80300000 | 2.01800000  | -3.36800000 |
| H | -6.68300000 | 0.93200000  | -3.41900000 |
| H | -7.87900000 | 2.20200000  | -3.41800000 |
| C | -6.20500000 | 2.65700000  | -4.62000000 |
| H | -6.73400000 | 2.30500000  | -5.50700000 |
| H | -6.28200000 | 3.74300000  | -4.59300000 |
| C | -5.93200000 | 3.09500000  | 2.38500000  |
| H | -6.17000000 | 3.65200000  | 3.29200000  |
| C | 2.40200000  | -6.85000000 | -1.39700000 |
| H | 2.63600000  | -7.90200000 | -1.32800000 |
| C | 2.62200000  | -5.91100000 | -2.37600000 |
| N | 1.59500000  | -4.89300000 | -0.76300000 |
| N | 2.11200000  | -4.73000000 | -1.93800000 |
| N | 1.77000000  | -6.17100000 | -0.41900000 |
| C | 3.32400000  | -6.05500000 | -3.68400000 |

|   |             |             |             |
|---|-------------|-------------|-------------|
| H | 4.20500000  | -5.40600000 | -3.70400000 |
| H | 3.70400000  | -7.07500000 | -3.78000000 |
| C | 2.47300000  | -5.79900000 | -4.92600000 |
| H | 3.04300000  | -6.04000000 | -5.82500000 |
| H | 1.57100000  | -6.41000000 | -4.92800000 |
| C | 1.94700000  | -6.10600000 | 2.07100000  |
| H | 1.58100000  | -6.63300000 | 2.95400000  |
| C | -6.93900000 | 3.15800000  | -1.04500000 |
| H | -7.96300000 | 3.47900000  | -0.92800000 |
| H | 3.02500000  | -6.25400000 | 2.01600000  |
| C | 1.24700000  | -6.66400000 | 0.83700000  |
| H | 1.37300000  | -7.74700000 | 0.85400000  |
| H | 0.17400000  | -6.46200000 | 0.87100000  |
| H | -6.60000000 | 2.23600000  | 2.33500000  |
| C | -6.11200000 | 4.01000000  | 1.17900000  |
| H | -7.11200000 | 4.44200000  | 1.24600000  |
| H | -5.40000000 | 4.83700000  | 1.20500000  |

### **G1cH [+6]**

|   |             |             |             |
|---|-------------|-------------|-------------|
| N | -5.57200000 | 1.19400000  | -3.37500000 |
| N | -1.10000000 | -1.01100000 | -3.50000000 |
| N | 1.14700000  | -0.31800000 | -3.53100000 |
| N | 1.45500000  | -5.29400000 | -3.64900000 |
| C | -5.17500000 | -0.05100000 | -3.68500000 |
| H | -5.95600000 | -0.76500000 | -3.91100000 |
| C | -3.84100000 | -0.37900000 | -3.71900000 |
| H | -3.54400000 | -1.38600000 | -3.97600000 |
| C | -2.88900000 | 0.59900000  | -3.44200000 |
| C | -1.44100000 | 0.27300000  | -3.46400000 |
| C | 0.20600000  | -1.25400000 | -3.53100000 |
| C | 0.64300000  | -2.67100000 | -3.57800000 |
| C | -0.25600000 | -3.69800000 | -3.32500000 |
| H | -1.29100000 | -3.48400000 | -3.09800000 |
| C | 0.18100000  | -5.00300000 | -3.35700000 |
| H | -0.47300000 | -5.84100000 | -3.15800000 |
| C | 2.33500000  | -4.32000000 | -3.92500000 |
| H | 3.34000000  | -4.63400000 | -4.18100000 |
| C | 1.96000000  | -2.99800000 | -3.88900000 |
| H | 2.68400000  | -2.23000000 | -4.12300000 |
| N | -5.24800000 | 1.70300000  | 3.74800000  |
| N | -1.08500000 | -1.03800000 | 3.57800000  |
| N | 1.23100000  | -0.62800000 | 3.53300000  |
| N | 0.91500000  | -5.60700000 | 3.46500000  |
| C | -5.01000000 | 0.42500000  | 3.42300000  |
| H | -5.87300000 | -0.18600000 | 3.19700000  |
| C | -3.72600000 | -0.06700000 | 3.38700000  |
| H | -3.55600000 | -1.10200000 | 3.12600000  |
| C | -2.66100000 | 0.78000000  | 3.66700000  |
| C | -1.26400000 | 0.27900000  | 3.60400000  |
| C | 0.18000000  | -1.44000000 | 3.54100000  |

|   |             |             |             |
|---|-------------|-------------|-------------|
| C | 0.43800000  | -2.90200000 | 3.52100000  |
| C | -0.57000000 | -3.80800000 | 3.84200000  |
| H | -1.55400000 | -3.46600000 | 4.13000000  |
| C | -0.30000000 | -5.15500000 | 3.81500000  |
| H | -1.04000000 | -5.90100000 | 4.07600000  |
| C | 1.90300000  | -4.75300000 | 3.16400000  |
| H | 2.85800000  | -5.18900000 | 2.90200000  |
| C | 1.69600000  | -3.39300000 | 3.19500000  |
| H | 2.50700000  | -2.72100000 | 2.95600000  |
| N | -0.57500000 | 1.28200000  | -3.45400000 |
| N | 3.60300000  | 4.02200000  | -3.51900000 |
| C | -4.67400000 | 2.15300000  | -3.11800000 |
| H | -5.06700000 | 3.13400000  | -2.89000000 |
| C | -3.32400000 | 1.88700000  | -3.15600000 |
| H | -2.61700000 | 2.68000000  | -2.95900000 |
| C | 0.70700000  | 0.93500000  | -3.49700000 |
| C | 1.72100000  | 2.02000000  | -3.51500000 |
| C | 1.35300000  | 3.33900000  | -3.76500000 |
| H | 0.32600000  | 3.60100000  | -3.97600000 |
| C | 2.31800000  | 4.31900000  | -3.76700000 |
| H | 2.09300000  | 5.35800000  | -3.97200000 |
| C | 3.98100000  | 2.75700000  | -3.29200000 |
| H | 5.03400000  | 2.59300000  | -3.11300000 |
| C | 3.06200000  | 1.73300000  | -3.29500000 |
| H | 3.38800000  | 0.71900000  | -3.11600000 |
| N | -0.28100000 | 1.17400000  | 3.58700000  |
| N | 4.20200000  | 3.38100000  | 3.56900000  |
| C | -4.23800000 | 2.53200000  | 4.06000000  |
| H | -4.50700000 | 3.54100000  | 4.34500000  |
| C | -2.93300000 | 2.09900000  | 4.02000000  |
| H | -2.13800000 | 2.78300000  | 4.28000000  |
| C | 0.94800000  | 0.67000000  | 3.55800000  |
| C | 2.08900000  | 1.62200000  | 3.56900000  |
| C | 1.88900000  | 2.97200000  | 3.31000000  |
| H | 0.90000000  | 3.35900000  | 3.10700000  |
| C | 2.96700000  | 3.82800000  | 3.30400000  |
| H | 2.86900000  | 4.88400000  | 3.09300000  |
| C | 4.41500000  | 2.08600000  | 3.85600000  |
| H | 5.43300000  | 1.80100000  | 4.09100000  |
| C | 3.37900000  | 1.18300000  | 3.85400000  |
| H | 3.57400000  | 0.14700000  | 4.09200000  |
| C | 5.69100000  | 5.35400000  | 0.09400000  |
| H | 6.46200000  | 6.10100000  | 0.20700000  |
| C | 4.75100000  | 5.13000000  | -0.88500000 |
| N | 4.47400000  | 3.58400000  | 0.60900000  |
| N | 4.03000000  | 4.03800000  | -0.51900000 |
| N | 5.47500000  | 4.37700000  | 0.99700000  |
| C | 4.47100000  | 5.90500000  | -2.12700000 |
| H | 3.47400000  | 6.35300000  | -2.06600000 |
| H | 5.17000000  | 6.74000000  | -2.20300000 |
| C | 6.18600000  | 4.09400000  | 2.22500000  |

|   |             |             |             |
|---|-------------|-------------|-------------|
| H | 6.56900000  | 3.07300000  | 2.17500000  |
| C | 4.59500000  | 5.11700000  | -3.43000000 |
| H | 4.43000000  | 5.77500000  | -4.28400000 |
| H | 5.58200000  | 4.66900000  | -3.53600000 |
| C | 5.35200000  | 4.30600000  | 3.48300000  |
| H | 5.98100000  | 4.14200000  | 4.36000000  |
| H | 4.96200000  | 5.32100000  | 3.53500000  |
| H | 7.04700000  | 4.76100000  | 2.28300000  |
| C | -7.09300000 | 1.45200000  | -0.71500000 |
| N | -5.61500000 | 1.85900000  | 0.81700000  |
| N | -5.79700000 | 1.29900000  | -0.33600000 |
| N | -6.78600000 | 2.36800000  | 1.20700000  |
| C | -7.62900000 | 0.89700000  | -1.99000000 |
| H | -7.51400000 | -0.19100000 | -1.99600000 |
| H | -8.70400000 | 1.08400000  | -2.04900000 |
| C | -7.01900000 | 1.48200000  | -3.26300000 |
| H | -7.50500000 | 1.05900000  | -4.14200000 |
| H | -7.13600000 | 2.56500000  | -3.30300000 |
| C | -6.62900000 | 2.22800000  | 3.69100000  |
| H | -6.79800000 | 2.82900000  | 4.58600000  |
| C | 1.73200000  | -7.81000000 | -0.10000000 |
| H | 1.97200000  | -8.86000000 | -0.02900000 |
| C | 1.98800000  | -6.86100000 | -1.06100000 |
| N | 0.87700000  | -5.86700000 | 0.51200000  |
| N | 1.44900000  | -5.68900000 | -0.63600000 |
| N | 1.04900000  | -7.14600000 | 0.85400000  |
| C | 2.73700000  | -6.98900000 | -2.34300000 |
| H | 3.62100000  | -6.34400000 | -2.32200000 |
| H | 3.11400000  | -8.00900000 | -2.44700000 |
| C | 1.92400000  | -6.69700000 | -3.60300000 |
| H | 2.53200000  | -6.86700000 | -4.49200000 |
| H | 1.04300000  | -7.33500000 | -3.67000000 |
| C | 1.14000000  | -7.06200000 | 3.34100000  |
| H | 0.71700000  | -7.54600000 | 4.22300000  |
| C | -7.73900000 | 2.14600000  | 0.28100000  |
| H | -8.75900000 | 2.48100000  | 0.39300000  |
| H | 2.21600000  | -7.23200000 | 3.34700000  |
| C | 0.49100000  | -7.64800000 | 2.09200000  |
| H | 0.63700000  | -8.72800000 | 2.11800000  |
| H | -0.58500000 | -7.46500000 | 2.08700000  |
| H | -7.30700000 | 1.37600000  | 3.72500000  |
| C | -6.88000000 | 3.09000000  | 2.45900000  |
| H | -7.88800000 | 3.49700000  | 2.54100000  |
| H | -6.19000000 | 3.93500000  | 2.42600000  |
| C | -2.20100000 | -1.84600000 | -0.00500000 |
| C | -0.89500000 | -2.26200000 | -0.00600000 |
| C | 0.16100000  | -1.32200000 | 0.00800000  |
| C | -0.15200000 | 0.06800000  | 0.04400000  |
| C | -1.51000000 | 0.46100000  | 0.04800000  |
| C | -2.51400000 | -0.47100000 | 0.01600000  |
| H | 1.74700000  | -2.77900000 | -0.07300000 |

|   |             |             |             |
|---|-------------|-------------|-------------|
| H | -3.00200000 | -2.57600000 | -0.02400000 |
| H | -0.64800000 | -3.32000000 | -0.02000000 |
| C | 1.51800000  | -1.71900000 | -0.01900000 |
| C | 0.90600000  | 1.00500000  | 0.06800000  |
| H | -1.75000000 | 1.52000000  | 0.06800000  |
| H | -3.54900000 | -0.14800000 | -0.00200000 |
| C | 2.21200000  | 0.59200000  | 0.05500000  |
| C | 2.51900000  | -0.78300000 | 0.00600000  |
| H | 0.66900000  | 2.06400000  | 0.09100000  |
| H | 3.01000000  | 1.32600000  | 0.07700000  |
| H | 3.55600000  | -1.09900000 | -0.01700000 |

### G2cH [+6]

|   |             |             |             |
|---|-------------|-------------|-------------|
| N | -5.65400000 | 3.06000000  | -4.33700000 |
| N | -1.21100000 | 0.83000000  | -3.91200000 |
| N | 1.04300000  | 1.50200000  | -3.91000000 |
| N | 1.28100000  | -3.47900000 | -3.61100000 |
| C | -5.26100000 | 1.77800000  | -4.39200000 |
| H | -6.03900000 | 1.04000000  | -4.53400000 |
| C | -3.93300000 | 1.44000000  | -4.28200000 |
| H | -3.64000000 | 0.40200000  | -4.33400000 |
| C | -2.98100000 | 2.44500000  | -4.13100000 |
| C | -1.53900000 | 2.11200000  | -4.03200000 |
| C | 0.09100000  | 0.57500000  | -3.86400000 |
| C | 0.51000000  | -0.84600000 | -3.77200000 |
| C | -0.41300000 | -1.83700000 | -3.46400000 |
| H | -1.44900000 | -1.59400000 | -3.27800000 |
| C | 0.00400000  | -3.14600000 | -3.37900000 |
| H | -0.66800000 | -3.95500000 | -3.13300000 |
| C | 2.18500000  | -2.54100000 | -3.93400000 |
| H | 3.19100000  | -2.88800000 | -4.13500000 |
| C | 1.83000000  | -1.21500000 | -4.01500000 |
| H | 2.57300000  | -0.47900000 | -4.28700000 |
| N | -5.73400000 | 4.04800000  | 2.66800000  |
| N | -1.56700000 | 1.32200000  | 2.92900000  |
| N | 0.74500000  | 1.74100000  | 3.06200000  |
| N | 0.41900000  | -3.23300000 | 3.40800000  |
| C | -5.47300000 | 2.75600000  | 2.42200000  |
| H | -6.32000000 | 2.13000000  | 2.17600000  |
| C | -4.18900000 | 2.26800000  | 2.48800000  |
| H | -4.00600000 | 1.22100000  | 2.28900000  |
| C | -3.14500000 | 3.13300000  | 2.79000000  |
| C | -1.74800000 | 2.63600000  | 2.86100000  |
| C | -0.30400000 | 0.92400000  | 3.03400000  |
| C | -0.05100000 | -0.53400000 | 3.15600000  |
| C | -1.10100000 | -1.42200000 | 3.37800000  |
| H | -2.11800000 | -1.06800000 | 3.46600000  |
| C | -0.83500000 | -2.76400000 | 3.51000000  |
| H | -1.61200000 | -3.49200000 | 3.70700000  |

|   |             |             |             |
|---|-------------|-------------|-------------|
| C | 1.44600000  | -2.39600000 | 3.19800000  |
| H | 2.42900000  | -2.84200000 | 3.13600000  |
| C | 1.24100000  | -1.04100000 | 3.08000000  |
| H | 2.08600000  | -0.38400000 | 2.92900000  |
| N | -0.66300000 | 3.11100000  | -4.08900000 |
| N | 3.53700000  | 5.81800000  | -4.13500000 |
| C | -4.75600000 | 4.04400000  | -4.19500000 |
| H | -5.14500000 | 5.05300000  | -4.16900000 |
| C | -3.41200000 | 3.76600000  | -4.10000000 |
| H | -2.70400000 | 4.57800000  | -4.00500000 |
| C | 0.61500000  | 2.75500000  | -4.02100000 |
| C | 1.63900000  | 3.82900000  | -4.07700000 |
| C | 1.29700000  | 5.12700000  | -4.44400000 |
| H | 0.28400000  | 5.37800000  | -4.72500000 |
| C | 2.26800000  | 6.10000000  | -4.47100000 |
| H | 2.06200000  | 7.12100000  | -4.76600000 |
| C | 3.89200000  | 4.57200000  | -3.79500000 |
| H | 4.93400000  | 4.41700000  | -3.55100000 |
| C | 2.96500000  | 3.55500000  | -3.76800000 |
| H | 3.27500000  | 2.55600000  | -3.49700000 |
| N | -0.76700000 | 3.53400000  | 2.87500000  |
| N | 3.69000000  | 5.77700000  | 2.99500000  |
| C | -4.74500000 | 4.89700000  | 2.99000000  |
| H | -5.03100000 | 5.91900000  | 3.20600000  |
| C | -3.44000000 | 4.46900000  | 3.05000000  |
| H | -2.66100000 | 5.16900000  | 3.31800000  |
| C | 0.46100000  | 3.03600000  | 2.97500000  |
| C | 1.59300000  | 3.99800000  | 2.99900000  |
| C | 1.39800000  | 5.32500000  | 2.63700000  |
| H | 0.42000000  | 5.68200000  | 2.34700000  |
| C | 2.46700000  | 6.19100000  | 2.63400000  |
| H | 2.37300000  | 7.22900000  | 2.34500000  |
| C | 3.89600000  | 4.50800000  | 3.38400000  |
| H | 4.90100000  | 4.25200000  | 3.69600000  |
| C | 2.86800000  | 3.59600000  | 3.38800000  |
| H | 3.05800000  | 2.58100000  | 3.70800000  |
| C | 5.42100000  | 7.47800000  | -0.54400000 |
| H | 6.20400000  | 8.21500000  | -0.45500000 |
| C | 4.53700000  | 7.17800000  | -1.55400000 |
| N | 4.12500000  | 5.79600000  | 0.06400000  |
| N | 3.76400000  | 6.14500000  | -1.13000000 |
| N | 5.12100000  | 6.60100000  | 0.43500000  |
| C | 4.34900000  | 7.82700000  | -2.88300000 |
| H | 3.36000000  | 8.29400000  | -2.92800000 |
| H | 5.06800000  | 8.64000000  | -2.99900000 |
| C | 5.75100000  | 6.41900000  | 1.72600000  |
| H | 6.14800000  | 5.40300000  | 1.77800000  |
| C | 4.53600000  | 6.91000000  | -4.09100000 |
| H | 4.43200000  | 7.48200000  | -5.01400000 |
| H | 5.52100000  | 6.44600000  | -4.09300000 |
| C | 4.83400000  | 6.70900000  | 2.90900000  |



|   |             |             |             |
|---|-------------|-------------|-------------|
| H | 5.40900000  | 6.62200000  | 3.83300000  |
| H | 4.43200000  | 7.72000000  | 2.85900000  |
| H | 6.59900000  | 7.10100000  | 1.79200000  |
| C | -7.36600000 | 3.56300000  | -1.85600000 |
| N | -5.96700000 | 4.04400000  | -0.27100000 |
| N | -6.09400000 | 3.42000000  | -1.39900000 |
| N | -7.15000000 | 4.58400000  | 0.02500000  |
| C | -7.83600000 | 2.93100000  | -3.12100000 |
| H | -7.78200000 | 1.84200000  | -3.02900000 |
| H | -8.89100000 | 3.16300000  | -3.28000000 |
| C | -7.10000000 | 3.37700000  | -4.38200000 |
| H | -7.51600000 | 2.87500000  | -5.25800000 |
| H | -7.18800000 | 4.45100000  | -4.53700000 |
| C | -7.11100000 | 4.56200000  | 2.51400000  |
| H | -7.32900000 | 5.20100000  | 3.37200000  |
| C | 1.44900000  | -5.75300000 | 0.13800000  |
| H | 1.72700000  | -6.78100000 | 0.31500000  |
| C | 1.70000000  | -4.88800000 | -0.90200000 |
| N | 0.49900000  | -3.79900000 | 0.53500000  |
| N | 1.10200000  | -3.70500000 | -0.60700000 |
| N | 0.70900000  | -5.03100000 | 1.00300000  |
| C | 2.49200000  | -5.10100000 | -2.14700000 |
| H | 3.38100000  | -4.46400000 | -2.13600000 |
| H | 2.86100000  | -6.12900000 | -2.17500000 |
| C | 1.72300000  | -4.88200000 | -3.44800000 |
| H | 2.35500000  | -5.12400000 | -4.30400000 |
| H | 0.83400000  | -5.50900000 | -3.50000000 |
| C | 0.66100000  | -4.69000000 | 3.46900000  |
| H | 0.18200000  | -5.07500000 | 4.37100000  |
| C | -8.05500000 | 4.31900000  | -0.93700000 |
| H | -9.07500000 | 4.67000000  | -0.89900000 |
| H | 1.73500000  | -4.83900000 | 3.57000000  |
| C | 0.11100000  | -5.43400000 | 2.25800000  |
| H | 0.30700000  | -6.49700000 | 2.40700000  |
| H | -0.97100000 | -5.31300000 | 2.18000000  |
| H | -7.78800000 | 3.70900000  | 2.55200000  |
| C | -7.30300000 | 5.36700000  | 1.23400000  |
| H | -8.31400000 | 5.77600000  | 1.24900000  |
| H | -6.61100000 | 6.21000000  | 1.19400000  |
| C | -3.52600000 | -1.78600000 | -0.34700000 |
| C | -2.19200000 | -1.51600000 | -0.25700000 |
| C | -1.71600000 | -0.18200000 | -0.36800000 |
| C | -2.66300000 | 0.87700000  | -0.56400000 |
| C | -4.04400000 | 0.55400000  | -0.66300000 |
| C | -4.46100000 | -0.74000000 | -0.55800000 |
| C | -0.35700000 | 0.12400000  | -0.29700000 |
| C | -2.20600000 | 2.19100000  | -0.65500000 |
| C | -0.84900000 | 2.49900000  | -0.57700000 |
| C | 0.10100000  | 1.43600000  | -0.40000000 |
| C | 1.48300000  | 1.76300000  | -0.33100000 |
| H | 2.20000000  | 0.95900000  | -0.19800000 |

|   |             |             |             |
|---|-------------|-------------|-------------|
| C | 1.90300000  | 3.05600000  | -0.43400000 |
| C | 0.96600000  | 4.10400000  | -0.61700000 |
| C | -0.36800000 | 3.83300000  | -0.68200000 |
| H | 0.35700000  | -0.68600000 | -0.17300000 |
| H | -3.88600000 | -2.80500000 | -0.26400000 |
| H | -1.47000000 | -2.31100000 | -0.09600000 |
| H | -4.75100000 | 1.36000000  | -0.83700000 |
| H | -5.51400000 | -0.98500000 | -0.63600000 |
| H | -2.93000000 | 2.98900000  | -0.79500000 |
| H | 2.95700000  | 3.30400000  | -0.37600000 |
| H | 1.33600000  | 5.11800000  | -0.71800000 |
| H | -1.08800000 | 4.63300000  | -0.82400000 |

### **G3cH [+6]**

|   |             |             |             |
|---|-------------|-------------|-------------|
| N | -5.33500000 | 1.53500000  | -3.56800000 |
| N | -0.90200000 | -0.75300000 | -3.59800000 |
| N | 1.35600000  | -0.09300000 | -3.62300000 |
| N | 1.55000000  | -5.08900000 | -3.73200000 |
| C | -4.96000000 | 0.27100000  | -3.82200000 |
| H | -5.75400000 | -0.43600000 | -4.02800000 |
| C | -3.63300000 | -0.08500000 | -3.82500000 |
| H | -3.35400000 | -1.10800000 | -4.03500000 |
| C | -2.66500000 | 0.88500000  | -3.58100000 |
| C | -1.22300000 | 0.53600000  | -3.59000000 |
| C | 0.40000000  | -1.01700000 | -3.62200000 |
| C | 0.80800000  | -2.44300000 | -3.66300000 |
| C | -0.11500000 | -3.44700000 | -3.39600000 |
| H | -1.14000000 | -3.20700000 | -3.15100000 |
| C | 0.28800000  | -4.76200000 | -3.42700000 |
| H | -0.38500000 | -5.58100000 | -3.21500000 |
| C | 2.45300000  | -4.13800000 | -4.02200000 |
| H | 3.44600000  | -4.47800000 | -4.28800000 |
| C | 2.11200000  | -2.80600000 | -3.98800000 |
| H | 2.85400000  | -2.05900000 | -4.23400000 |
| N | -5.05500000 | 1.92200000  | 3.51600000  |
| N | -0.90300000 | -0.83200000 | 3.35200000  |
| N | 1.41500000  | -0.43200000 | 3.39100000  |
| N | 1.05900000  | -5.42000000 | 3.33200000  |
| C | -4.81400000 | 0.66100000  | 3.12900000  |
| H | -5.67400000 | 0.06600000  | 2.85400000  |
| C | -3.53100000 | 0.16400000  | 3.09500000  |
| H | -3.36200000 | -0.85600000 | 2.78300000  |
| C | -2.47100000 | 0.99100000  | 3.44400000  |
| C | -1.07700000 | 0.48400000  | 3.40900000  |
| C | 0.36100000  | -1.24200000 | 3.35400000  |
| C | 0.60700000  | -2.70700000 | 3.34000000  |
| C | -0.43600000 | -3.60300000 | 3.55800000  |
| H | -1.44100000 | -3.25100000 | 3.74500000  |
| C | -0.17900000 | -4.95300000 | 3.55900000  |
| H | -0.95000000 | -5.69000000 | 3.74600000  |

|   |             |             |             |
|---|-------------|-------------|-------------|
| C | 2.08000000  | -4.57600000 | 3.12400000  |
| H | 3.05100000  | -5.02100000 | 2.95800000  |
| C | 1.88400000  | -3.21400000 | 3.13300000  |
| H | 2.72500000  | -2.55300000 | 2.97600000  |
| N | -0.34500000 | 1.53200000  | -3.60100000 |
| N | 3.83700000  | 4.24700000  | -3.60400000 |
| C | -4.42000000 | 2.48500000  | -3.33400000 |
| H | -4.79600000 | 3.48100000  | -3.14600000 |
| C | -3.07600000 | 2.19000000  | -3.34400000 |
| H | -2.35400000 | 2.97300000  | -3.16400000 |
| C | 0.93200000  | 1.16700000  | -3.61500000 |
| C | 1.95400000  | 2.24400000  | -3.62600000 |
| C | 1.59000000  | 3.56400000  | -3.87700000 |
| H | 0.56400000  | 3.82600000  | -4.09400000 |
| C | 2.55400000  | 4.54400000  | -3.86700000 |
| H | 2.33100000  | 5.58300000  | -4.07200000 |
| C | 4.21200000  | 2.98200000  | -3.37600000 |
| H | 5.26300000  | 2.81700000  | -3.18600000 |
| C | 3.29200000  | 1.95700000  | -3.39300000 |
| H | 3.62000000  | 0.94200000  | -3.21900000 |
| N | -0.09300000 | 1.37400000  | 3.45500000  |
| N | 4.37500000  | 3.59000000  | 3.50700000  |
| C | -4.04800000 | 2.73100000  | 3.88400000  |
| H | -4.31900000 | 3.72600000  | 4.21300000  |
| C | -2.74500000 | 2.29500000  | 3.84800000  |
| H | -1.95100000 | 2.96200000  | 4.15400000  |
| C | 1.13600000  | 0.86600000  | 3.43800000  |
| C | 2.27300000  | 1.82100000  | 3.48300000  |
| C | 2.06600000  | 3.17200000  | 3.23300000  |
| H | 1.07700000  | 3.54900000  | 3.01700000  |
| C | 3.13800000  | 4.03300000  | 3.23900000  |
| H | 3.03700000  | 5.08900000  | 3.03200000  |
| C | 4.59400000  | 2.29600000  | 3.79100000  |
| H | 5.61200000  | 2.01600000  | 4.03100000  |
| C | 3.56200000  | 1.38700000  | 3.77900000  |
| H | 3.76200000  | 0.35100000  | 4.01400000  |
| C | 5.88500000  | 5.56800000  | 0.00300000  |
| H | 6.69800000  | 6.27200000  | 0.09600000  |
| C | 4.92200000  | 5.38200000  | -0.96100000 |
| N | 4.57300000  | 3.88000000  | 0.56300000  |
| N | 4.14200000  | 4.34100000  | -0.56800000 |
| N | 5.62300000  | 4.62100000  | 0.92500000  |
| C | 4.67400000  | 6.14600000  | -2.21600000 |
| H | 3.67800000  | 6.59800000  | -2.18200000 |
| H | 5.37900000  | 6.97700000  | -2.28500000 |
| C | 6.34100000  | 4.31500000  | 2.14500000  |
| H | 6.71500000  | 3.29100000  | 2.08100000  |
| C | 4.82600000  | 5.34300000  | -3.50800000 |
| H | 4.68000000  | 5.99100000  | -4.37300000 |
| H | 5.81500000  | 4.89400000  | -3.58700000 |
| C | 5.52100000  | 4.51800000  | 3.41400000  |

|   |             |             |             |
|---|-------------|-------------|-------------|
| H | 6.16200000  | 4.35000000  | 4.28200000  |
| H | 5.13100000  | 5.53300000  | 3.47700000  |
| H | 7.20800000  | 4.97400000  | 2.20300000  |
| C | -6.89000000 | 1.83200000  | -0.94300000 |
| N | -5.40600000 | 2.21700000  | 0.59000000  |
| N | -5.59000000 | 1.68600000  | -0.57700000 |
| N | -6.57900000 | 2.69900000  | 1.00200000  |
| C | -7.42800000 | 1.29900000  | -2.22700000 |
| H | -7.35600000 | 0.20700000  | -2.23200000 |
| H | -8.49400000 | 1.52600000  | -2.30100000 |
| C | -6.77700000 | 1.85900000  | -3.48900000 |
| H | -7.25500000 | 1.44200000  | -4.37600000 |
| H | -6.86600000 | 2.94400000  | -3.53800000 |
| C | -6.43400000 | 2.45200000  | 3.47400000  |
| H | -6.60700000 | 3.01100000  | 4.39500000  |
| C | 1.87400000  | -7.67300000 | -0.17700000 |
| H | 2.16600000  | -8.70900000 | -0.09300000 |
| C | 2.06600000  | -6.73100000 | -1.16000000 |
| N | 0.93500000  | -5.76500000 | 0.41600000  |
| N | 1.47700000  | -5.58000000 | -0.74600000 |
| N | 1.17700000  | -7.02500000 | 0.77700000  |
| C | 2.79900000  | -6.84000000 | -2.45400000 |
| H | 3.69500000  | -6.21100000 | -2.42800000 |
| H | 3.15600000  | -7.86300000 | -2.58600000 |
| C | 1.97800000  | -6.50600000 | -3.69800000 |
| H | 2.57000000  | -6.68700000 | -4.59600000 |
| H | 1.07800000  | -7.11600000 | -3.76100000 |
| C | 1.28800000  | -6.87900000 | 3.26000000  |
| H | 0.86300000  | -7.33200000 | 4.15800000  |
| C | -7.53700000 | 2.48900000  | 0.07700000  |
| H | -8.55900000 | 2.80900000  | 0.20400000  |
| H | 2.36400000  | -7.04300000 | 3.27900000  |
| C | 0.65300000  | -7.52200000 | 2.03200000  |
| H | 0.84500000  | -8.59500000 | 2.08500000  |
| H | -0.43000000 | -7.38700000 | 2.03200000  |
| H | -7.11400000 | 1.60100000  | 3.46500000  |
| C | -6.67600000 | 3.36900000  | 2.28100000  |
| H | -7.68200000 | 3.77900000  | 2.37700000  |
| H | -5.98000000 | 4.21100000  | 2.28600000  |
| C | -3.11600000 | -3.21400000 | -0.15300000 |
| C | -1.74300000 | -3.25000000 | -0.10700000 |
| C | -0.99000000 | -2.06200000 | -0.10900000 |
| C | -1.65100000 | -0.80900000 | -0.13500000 |
| C | -3.05700000 | -0.80100000 | -0.19700000 |
| C | -3.77100000 | -1.97700000 | -0.20800000 |
| C | 0.43700000  | -2.11500000 | -0.10500000 |
| C | -0.86100000 | 0.40400000  | -0.11100000 |
| C | 0.55500000  | 0.30600000  | -0.11100000 |
| C | 1.17500000  | -0.98000000 | -0.11500000 |
| C | 1.33300000  | 1.47800000  | -0.11600000 |
| H | 2.41500000  | 1.39400000  | -0.12500000 |

|   |             |             |             |
|---|-------------|-------------|-------------|
| C | 0.74400000  | 2.72000000  | -0.11400000 |
| C | -0.65200000 | 2.82000000  | -0.08900000 |
| C | -1.43600000 | 1.68800000  | -0.08600000 |
| H | 0.91400000  | -3.09000000 | -0.11900000 |
| H | -3.69200000 | -4.13200000 | -0.15600000 |
| H | -1.21200000 | -4.19600000 | -0.07100000 |
| H | -3.60200000 | 0.13300000  | -0.25500000 |
| H | -4.85400000 | -1.94700000 | -0.26300000 |
| H | 2.26000000  | -1.02800000 | -0.12700000 |
| H | 1.36500000  | 3.60800000  | -0.13600000 |
| H | -1.12200000 | 3.79700000  | -0.07400000 |
| H | -2.51400000 | 1.79800000  | -0.06400000 |

### **G4cH [+6]**

|   |             |             |             |
|---|-------------|-------------|-------------|
| N | -4.76100000 | 2.46700000  | -4.67800000 |
| N | -0.39900000 | 0.00800000  | -4.72800000 |
| N | 1.87700000  | 0.59900000  | -4.78700000 |
| N | 1.97600000  | -4.39300000 | -4.86400000 |
| C | -4.44000000 | 1.18200000  | -4.89500000 |
| H | -5.26300000 | 0.50000000  | -5.06300000 |
| C | -3.12600000 | 0.77300000  | -4.91500000 |
| H | -2.89500000 | -0.26800000 | -5.09600000 |
| C | -2.11400000 | 1.70900000  | -4.72400000 |
| C | -0.68300000 | 1.30600000  | -4.73700000 |
| C | 0.89600000  | -0.29500000 | -4.76300000 |
| C | 1.27400000  | -1.73200000 | -4.79200000 |
| C | 0.34800000  | -2.72000000 | -4.48100000 |
| H | -0.66500000 | -2.46500000 | -4.20600000 |
| C | 0.73200000  | -4.04200000 | -4.51500000 |
| H | 0.05200000  | -4.84900000 | -4.27600000 |
| C | 2.88300000  | -3.45700000 | -5.18700000 |
| H | 3.86100000  | -3.81200000 | -5.48600000 |
| C | 2.56300000  | -2.12000000 | -5.15100000 |
| H | 3.30800000  | -1.38700000 | -5.42500000 |
| N | -4.63200000 | 2.48600000  | 2.38800000  |
| N | -0.39600000 | -0.17900000 | 2.27200000  |
| N | 1.90700000  | 0.30100000  | 2.26000000  |
| N | 1.81900000  | -4.68100000 | 2.19900000  |
| C | -4.36400000 | 1.21100000  | 2.06800000  |
| H | -5.21300000 | 0.58300000  | 1.83700000  |
| C | -3.07100000 | 0.74000000  | 2.04800000  |
| H | -2.88200000 | -0.29300000 | 1.79000000  |
| C | -2.02300000 | 1.60400000  | 2.34200000  |
| C | -0.61300000 | 1.13300000  | 2.30300000  |
| C | 0.88200000  | -0.54500000 | 2.25400000  |
| C | 1.19900000  | -1.99800000 | 2.23900000  |
| C | 0.22000000  | -2.95800000 | 2.47700000  |
| H | -0.80100000 | -2.67200000 | 2.69100000  |
| C | 0.56000000  | -4.29200000 | 2.46100000  |
| H | -0.15900000 | -5.07500000 | 2.66400000  |

|   |             |             |             |
|---|-------------|-------------|-------------|
| C | 2.77900000  | -3.77300000 | 1.97400000  |
| H | 3.77100000  | -4.15500000 | 1.77700000  |
| C | 2.49900000  | -2.42700000 | 1.99800000  |
| H | 3.29100000  | -1.71400000 | 1.81900000  |
| N | 0.22800000  | 2.27600000  | -4.76200000 |
| N | 4.52500000  | 4.83200000  | -4.80200000 |
| C | -3.80300000 | 3.38600000  | -4.50000000 |
| H | -4.13200000 | 4.40300000  | -4.34100000 |
| C | -2.47200000 | 3.03700000  | -4.53000000 |
| H | -1.71700000 | 3.79800000  | -4.39400000 |
| C | 1.49400000  | 1.87200000  | -4.78300000 |
| C | 2.55500000  | 2.91100000  | -4.80800000 |
| C | 2.24700000  | 4.24700000  | -5.05100000 |
| H | 1.23200000  | 4.55500000  | -5.25700000 |
| C | 3.25400000  | 5.18400000  | -5.04900000 |
| H | 3.07300000  | 6.23200000  | -5.25100000 |
| C | 4.84600000  | 3.55100000  | -4.58100000 |
| H | 5.89100000  | 3.33900000  | -4.40200000 |
| C | 3.88300000  | 2.56800000  | -4.59000000 |
| H | 4.16700000  | 1.54000000  | -4.41800000 |
| N | 0.34300000  | 2.05700000  | 2.30700000  |
| N | 4.76500000  | 4.39500000  | 2.30700000  |
| C | -3.63800000 | 3.33100000  | 2.70500000  |
| H | -3.92400000 | 4.33700000  | 2.98500000  |
| C | -2.32600000 | 2.92000000  | 2.68100000  |
| H | -1.54500000 | 3.62000000  | 2.94400000  |
| C | 1.58700000  | 1.59000000  | 2.28700000  |
| C | 2.70000000  | 2.57600000  | 2.30400000  |
| C | 2.46600000  | 3.91700000  | 2.02800000  |
| H | 1.47000000  | 4.27000000  | 1.80200000  |
| C | 3.51900000  | 4.80200000  | 2.02500000  |
| H | 3.39300000  | 5.85300000  | 1.80100000  |
| C | 5.01100000  | 3.11000000  | 2.60900000  |
| H | 6.03300000  | 2.85500000  | 2.86100000  |
| C | 4.00000000  | 2.17800000  | 2.60600000  |
| H | 4.22300000  | 1.15000000  | 2.85700000  |
| C | 6.52400000  | 6.29600000  | -1.16000000 |
| H | 7.31500000  | 7.02000000  | -1.03600000 |
| C | 5.64500000  | 6.04600000  | -2.18800000 |
| N | 5.20200000  | 4.60800000  | -0.62700000 |
| N | 4.85700000  | 5.00800000  | -1.80900000 |
| N | 6.20400000  | 5.38600000  | -0.21800000 |
| C | 5.46200000  | 6.75400000  | -3.48800000 |
| H | 4.49900000  | 7.27600000  | -3.48900000 |
| H | 6.22000000  | 7.53200000  | -3.59200000 |
| C | 6.82000000  | 5.14400000  | 1.07000000  |
| H | 7.23500000  | 4.13400000  | 1.07300000  |
| C | 5.57200000  | 5.87900000  | -4.73500000 |
| H | 5.47100000  | 6.49400000  | -5.63100000 |
| H | 6.53400000  | 5.37200000  | -4.78300000 |
| C | 5.88600000  | 5.35900000  | 2.25400000  |

|   |             |             |             |
|---|-------------|-------------|-------------|
| H | 6.45800000  | 5.25400000  | 3.17800000  |
| H | 5.45600000  | 6.36000000  | 2.24000000  |
| H | 7.65600000  | 5.83600000  | 1.18300000  |
| C | -6.46100000 | 2.75800000  | -2.09100000 |
| N | -5.01600000 | 3.05400000  | -0.50400000 |
| N | -5.16200000 | 2.64000000  | -1.72200000 |
| N | -6.21300000 | 3.43200000  | -0.06300000 |
| C | -6.94600000 | 2.30800000  | -3.42800000 |
| H | -6.94700000 | 1.21400000  | -3.47000000 |
| H | -7.98900000 | 2.60400000  | -3.56100000 |
| C | -6.18900000 | 2.87000000  | -4.62800000 |
| H | -6.65200000 | 2.52100000  | -5.55300000 |
| H | -6.21000000 | 3.95800000  | -4.63400000 |
| C | -6.03200000 | 2.96900000  | 2.38000000  |
| H | -6.22500000 | 3.44100000  | 3.34600000  |
| C | 2.56700000  | -7.03800000 | -1.39500000 |
| H | 2.77200000  | -8.09600000 | -1.35700000 |
| C | 2.74100000  | -6.09100000 | -2.38000000 |
| N | 1.88000000  | -5.06900000 | -0.67700000 |
| N | 2.31000000  | -4.90300000 | -1.88700000 |
| N | 2.03800000  | -6.35200000 | -0.36200000 |
| C | 3.31400000  | -6.21300000 | -3.75000000 |
| H | 4.23500000  | -5.62600000 | -3.81700000 |
| H | 3.60600000  | -7.24800000 | -3.93800000 |
| C | 2.36900000  | -5.82300000 | -4.88500000 |
| H | 2.84900000  | -6.00800000 | -5.84800000 |
| H | 1.44900000  | -6.40600000 | -4.85400000 |
| C | 2.14800000  | -6.12200000 | 2.12200000  |
| H | 1.77100000  | -6.59900000 | 3.03000000  |
| C | -7.15200000 | 3.27500000  | -1.01900000 |
| H | -8.19000000 | 3.53300000  | -0.87400000 |
| H | 3.23400000  | -6.20600000 | 2.12900000  |
| C | 1.55000000  | -6.83400000 | 0.91600000  |
| H | 1.80800000  | -7.89000000 | 1.00300000  |
| H | 0.45900000  | -6.76800000 | 0.92100000  |
| H | -6.67600000 | 2.09400000  | 2.30200000  |
| C | -6.33500000 | 3.97400000  | 1.27400000  |
| H | -7.36300000 | 4.31200000  | 1.41600000  |
| H | -5.69300000 | 4.85400000  | 1.35100000  |
| C | -1.75200000 | -2.55900000 | -1.13400000 |
| C | -0.36600000 | -2.61400000 | -1.15000000 |
| C | 0.39500000  | -1.44400000 | -1.20100000 |
| C | -0.26700000 | -0.19200000 | -1.21600000 |
| C | -1.68500000 | -0.14400000 | -1.20600000 |
| C | -2.40700000 | -1.33900000 | -1.17200000 |
| C | 1.82500000  | -1.46600000 | -1.25100000 |
| C | 0.48200000  | 1.01200000  | -1.24700000 |
| C | 1.90200000  | 0.96300000  | -1.27400000 |
| C | 2.54200000  | -0.31600000 | -1.28300000 |
| C | 2.61700000  | 2.16100000  | -1.31200000 |
| H | 3.70200000  | 2.14200000  | -1.33100000 |



|   |             |             |             |
|---|-------------|-------------|-------------|
| C | 1.95700000  | 3.38100000  | -1.33200000 |
| C | 0.57400000  | 3.43600000  | -1.30100000 |
| C | -0.18500000 | 2.26400000  | -1.25700000 |
| C | -1.61300000 | 2.27900000  | -1.24200000 |
| C | -2.32700000 | 1.12800000  | -1.22900000 |
| H | -3.40900000 | 1.17300000  | -1.25000000 |
| H | -2.13000000 | 3.23200000  | -1.25000000 |
| H | 2.31900000  | -2.43100000 | -1.28400000 |
| H | -2.32900000 | -3.47600000 | -1.10000000 |
| H | 0.14700000  | -3.56700000 | -1.12000000 |
| H | -3.49100000 | -1.30300000 | -1.17500000 |
| H | 3.62600000  | -0.34800000 | -1.32600000 |
| H | 2.54500000  | 4.29000000  | -1.38700000 |
| H | 0.06500000  | 4.39500000  | -1.31900000 |

### G5cH [+6]

|   |             |             |             |
|---|-------------|-------------|-------------|
| N | -5.53100000 | 1.05400000  | -3.48400000 |
| N | -0.98400000 | -0.99600000 | -3.68300000 |
| N | 1.23300000  | -0.21200000 | -3.72300000 |
| N | 1.72800000  | -5.17700000 | -3.86500000 |
| C | -5.09900000 | -0.17300000 | -3.81900000 |
| H | -5.86000000 | -0.90700000 | -4.05100000 |
| C | -3.75600000 | -0.45800000 | -3.86900000 |
| H | -3.43000000 | -1.45100000 | -4.14500000 |
| C | -2.83300000 | 0.54500000  | -3.58600000 |
| C | -1.37500000 | 0.27300000  | -3.63500000 |
| C | 0.33000000  | -1.18600000 | -3.72700000 |
| C | 0.82200000  | -2.58500000 | -3.78000000 |
| C | -0.03600000 | -3.64400000 | -3.51800000 |
| H | -1.07400000 | -3.46900000 | -3.27300000 |
| C | 0.44800000  | -4.93200000 | -3.55800000 |
| H | -0.17200000 | -5.79400000 | -3.35400000 |
| C | 2.57000000  | -4.17000000 | -4.14600000 |
| H | 3.58300000  | -4.44600000 | -4.41200000 |
| C | 2.14700000  | -2.86300000 | -4.10300000 |
| H | 2.84100000  | -2.06800000 | -4.33600000 |
| N | -5.21100000 | 1.45400000  | 3.62600000  |
| N | -0.92600000 | -1.08700000 | 3.41100000  |
| N | 1.36800000  | -0.56600000 | 3.36200000  |
| N | 1.30800000  | -5.55100000 | 3.23800000  |
| C | -4.91300000 | 0.19800000  | 3.26200000  |
| H | -5.74700000 | -0.44600000 | 3.02100000  |
| C | -3.60800000 | -0.23300000 | 3.21000000  |
| H | -3.39000000 | -1.25000000 | 2.91700000  |
| C | -2.58400000 | 0.65500000  | 3.51900000  |
| C | -1.16700000 | 0.21800000  | 3.45800000  |
| C | 0.35700000  | -1.42900000 | 3.36500000  |
| C | 0.68700000  | -2.87600000 | 3.32000000  |
| C | -0.26700000 | -3.83600000 | 3.64500000  |

|   |             |             |             |
|---|-------------|-------------|-------------|
| H | -1.26500000 | -3.55000000 | 3.94500000  |
| C | 0.07400000  | -5.16700000 | 3.60500000  |
| H | -0.62100000 | -5.95300000 | 3.87000000  |
| C | 2.24300000  | -4.64300000 | 2.92500000  |
| H | 3.21500000  | -5.02500000 | 2.64700000  |
| C | 1.96400000  | -3.29600000 | 2.96800000  |
| H | 2.73300000  | -2.58100000 | 2.71600000  |
| N | -0.55300000 | 1.31600000  | -3.62700000 |
| N | 3.49900000  | 4.23000000  | -3.64100000 |
| C | -4.66100000 | 2.03500000  | -3.21300000 |
| H | -5.08300000 | 2.99800000  | -2.96000000 |
| C | -3.30400000 | 1.81200000  | -3.26600000 |
| H | -2.61900000 | 2.61900000  | -3.04900000 |
| C | 0.74200000  | 1.02100000  | -3.67300000 |
| C | 1.70700000  | 2.14800000  | -3.66700000 |
| C | 1.28200000  | 3.45300000  | -3.89700000 |
| H | 0.24300000  | 3.67100000  | -4.10000000 |
| C | 2.20200000  | 4.47400000  | -3.88600000 |
| H | 1.93200000  | 5.50400000  | -4.08100000 |
| C | 3.93100000  | 2.98200000  | -3.42300000 |
| H | 4.99000000  | 2.86200000  | -3.24200000 |
| C | 3.05800000  | 1.91800000  | -3.44100000 |
| H | 3.42800000  | 0.91700000  | -3.26800000 |
| N | -0.22900000 | 1.15900000  | 3.46000000  |
| N | 4.11900000  | 3.60100000  | 3.43200000  |
| C | -4.24000000 | 2.32200000  | 3.95300000  |
| H | -4.55500000 | 3.31000000  | 4.26400000  |
| C | -2.91700000 | 1.95200000  | 3.89900000  |
| H | -2.15200000 | 2.66700000  | 4.16900000  |
| C | 1.02300000  | 0.71500000  | 3.41100000  |
| C | 2.11100000  | 1.72500000  | 3.41900000  |
| C | 1.83400000  | 3.06100000  | 3.15900000  |
| H | 0.82600000  | 3.38600000  | 2.94200000  |
| C | 2.86100000  | 3.97700000  | 3.16200000  |
| H | 2.70400000  | 5.02600000  | 2.95400000  |
| C | 4.40700000  | 2.31800000  | 3.70900000  |
| H | 5.43900000  | 2.09200000  | 3.94500000  |
| C | 3.42400000  | 1.35700000  | 3.70000000  |
| H | 3.67800000  | 0.33200000  | 3.92800000  |
| C | 5.52300000  | 5.67400000  | -0.03400000 |
| H | 6.26800000  | 6.44800000  | 0.07200000  |
| C | 4.59100000  | 5.40900000  | -1.01000000 |
| N | 4.37200000  | 3.86600000  | 0.49600000  |
| N | 3.90900000  | 4.29600000  | -0.63400000 |
| N | 5.34300000  | 4.69700000  | 0.87600000  |
| C | 4.28200000  | 6.16000000  | -2.26000000 |
| H | 3.26700000  | 6.56700000  | -2.20500000 |
| H | 4.94500000  | 7.02400000  | -2.34100000 |
| C | 6.06500000  | 4.44600000  | 2.10700000  |
| H | 6.51100000  | 3.45100000  | 2.05000000  |
| C | 4.44300000  | 5.36700000  | -3.55400000 |

|   |             |             |             |
|---|-------------|-------------|-------------|
| H | 4.25700000  | 6.01100000  | -4.41500000 |
| H | 5.44900000  | 4.95900000  | -3.65200000 |
| C | 5.21200000  | 4.59300000  | 3.36100000  |
| H | 5.84500000  | 4.45900000  | 4.24000000  |
| H | 4.76200000  | 5.58300000  | 3.42000000  |
| H | 6.88200000  | 5.16500000  | 2.17600000  |
| C | -7.06500000 | 1.24500000  | -0.81300000 |
| N | -5.60100000 | 1.73400000  | 0.70900000  |
| N | -5.75500000 | 1.19100000  | -0.45700000 |
| N | -6.80200000 | 2.13200000  | 1.13100000  |
| C | -7.57500000 | 0.68000000  | -2.09400000 |
| H | -7.41900000 | -0.40300000 | -2.11000000 |
| H | -8.65600000 | 0.82600000  | -2.15300000 |
| C | -6.98600000 | 1.29800000  | -3.36000000 |
| H | -7.46300000 | 0.87100000  | -4.24300000 |
| H | -7.13500000 | 2.37700000  | -3.38700000 |
| C | -6.61700000 | 1.90900000  | 3.60400000  |
| H | -6.80500000 | 2.46600000  | 4.52300000  |
| C | 2.18600000  | -7.73000000 | -0.33500000 |
| H | 2.48900000  | -8.76400000 | -0.27000000 |
| C | 2.36400000  | -6.77000000 | -1.30300000 |
| N | 1.23500000  | -5.84100000 | 0.29600000  |
| N | 1.76700000  | -5.63100000 | -0.86500000 |
| N | 1.48900000  | -7.10600000 | 0.63400000  |
| C | 3.09000000  | -6.84900000 | -2.60300000 |
| H | 3.95200000  | -6.17600000 | -2.58600000 |
| H | 3.49900000  | -7.85400000 | -2.73200000 |
| C | 2.24300000  | -6.56400000 | -3.84100000 |
| H | 2.83900000  | -6.70500000 | -4.74400000 |
| H | 1.38300000  | -7.22900000 | -3.90000000 |
| C | 1.61700000  | -6.99100000 | 3.11800000  |
| H | 1.23900000  | -7.49200000 | 4.01100000  |
| C | -7.74900000 | 1.85500000  | 0.21300000  |
| H | -8.79100000 | 2.10200000  | 0.34800000  |
| H | 2.70100000  | -7.09600000 | 3.10900000  |
| C | 0.98700000  | -7.63100000 | 1.88600000  |
| H | 1.20500000  | -8.69900000 | 1.92100000  |
| H | -0.09900000 | -7.52000000 | 1.89900000  |
| H | -7.25000000 | 1.02200000  | 3.61400000  |
| C | -6.93100000 | 2.80100000  | 2.40800000  |
| H | -7.96100000 | 3.14400000  | 2.51200000  |
| H | -6.29200000 | 3.68600000  | 2.40200000  |
| C | 1.01400000  | -1.06500000 | -0.21000000 |
| C | 2.03500000  | -2.02500000 | -0.30900000 |
| C | 3.36300000  | -1.66300000 | -0.32500000 |
| C | 3.71500000  | -0.31700000 | -0.23500000 |
| C | 2.73200000  | 0.64400000  | -0.16200000 |
| C | 1.36900000  | 0.30100000  | -0.16500000 |
| C | -0.39000000 | -1.45400000 | -0.16700000 |
| C | -0.77300000 | -2.80600000 | -0.16600000 |
| C | -2.09900000 | -3.17700000 | -0.15600000 |

|   |             |             |             |
|---|-------------|-------------|-------------|
| C | -3.09200000 | -2.19900000 | -0.15900000 |
| C | -2.74200000 | -0.86800000 | -0.14000000 |
| C | -1.39600000 | -0.46400000 | -0.12500000 |
| H | 1.79200000  | -3.07700000 | -0.39100000 |
| H | 4.13100000  | -2.42300000 | -0.40800000 |
| H | 4.75900000  | -0.02500000 | -0.23100000 |
| H | 3.03400000  | 1.68100000  | -0.09700000 |
| H | -0.02300000 | -3.58600000 | -0.16800000 |
| H | -2.36700000 | -4.22800000 | -0.15500000 |
| H | -4.13800000 | -2.48500000 | -0.17700000 |
| H | -3.53500000 | -0.13100000 | -0.15400000 |
| C | -2.00600000 | 1.95200000  | 0.00700000  |
| C | -1.02900000 | 0.94600000  | -0.07900000 |
| C | 0.33100000  | 1.32300000  | -0.12100000 |
| C | 0.65200000  | 2.69100000  | -0.13200000 |
| C | -0.32500000 | 3.65900000  | -0.06700000 |
| C | -1.66600000 | 3.28600000  | 0.02000000  |
| H | -3.05400000 | 1.69100000  | 0.07000000  |
| H | 1.68300000  | 3.01100000  | -0.21000000 |
| H | -0.05100000 | 4.70700000  | -0.08300000 |
| H | -2.43900000 | 4.04200000  | 0.08800000  |

### G6cH [+6]

|   |             |             |             |
|---|-------------|-------------|-------------|
| N | -5.44600000 | 1.74900000  | -3.67300000 |
| N | -1.10600000 | -0.73100000 | -3.68400000 |
| N | 1.17800000  | -0.18600000 | -3.77800000 |
| N | 1.18600000  | -5.17800000 | -3.76400000 |
| C | -5.12300000 | 0.45300000  | -3.55600000 |
| H | -5.93800000 | -0.24400000 | -3.43100000 |
| C | -3.80700000 | 0.04500000  | -3.58900000 |
| H | -3.57600000 | -1.00500000 | -3.49500000 |
| C | -2.79400000 | 0.98600000  | -3.73600000 |
| C | -1.36600000 | 0.57200000  | -3.73400000 |
| C | 0.18000000  | -1.06100000 | -3.73200000 |
| C | 0.53000000  | -2.50500000 | -3.74900000 |
| C | -0.42800000 | -3.47500000 | -3.48100000 |
| H | -1.45000000 | -3.19800000 | -3.26400000 |
| C | -0.06900000 | -4.80400000 | -3.48400000 |
| H | -0.77200000 | -5.59700000 | -3.27200000 |
| C | 2.12200000  | -4.26200000 | -4.05800000 |
| H | 3.10500000  | -4.63700000 | -4.31000000 |
| C | 1.82500000  | -2.91900000 | -4.04900000 |
| H | 2.59400000  | -2.20200000 | -4.29600000 |
| N | -5.21000000 | 1.26000000  | 3.37100000  |
| N | -0.87400000 | -1.18600000 | 3.72400000  |
| N | 1.41300000  | -0.63300000 | 3.69600000  |
| N | 1.33800000  | -5.63100000 | 3.45200000  |
| C | -4.85100000 | -0.00900000 | 3.12800000  |
| H | -5.64000000 | -0.68700000 | 2.83400000  |

|   |             |             |             |
|---|-------------|-------------|-------------|
| C | -3.53900000 | -0.40700000 | 3.24700000  |
| H | -3.27700000 | -1.43700000 | 3.05100000  |
| C | -2.56500000 | 0.52300000  | 3.59000000  |
| C | -1.13800000 | 0.11600000  | 3.67300000  |
| C | 0.41300000  | -1.50900000 | 3.72100000  |
| C | 0.75100000  | -2.95500000 | 3.67800000  |
| C | -0.18600000 | -3.92000000 | 4.03700000  |
| H | -1.16000000 | -3.63900000 | 4.41300000  |
| C | 0.13900000  | -5.25100000 | 3.92400000  |
| H | -0.54500000 | -6.04100000 | 4.20800000  |
| C | 2.26200000  | -4.71800000 | 3.12000000  |
| H | 3.20900000  | -5.09700000 | 2.76200000  |
| C | 2.00000000  | -3.37300000 | 3.23600000  |
| H | 2.76100000  | -2.65400000 | 2.96500000  |
| N | -0.43700000 | 1.52400000  | -3.78900000 |
| N | 3.96300000  | 3.94500000  | -3.77500000 |
| C | -4.48500000 | 2.67200000  | -3.84900000 |
| H | -4.81600000 | 3.69600000  | -3.96700000 |
| C | -3.15500000 | 2.32100000  | -3.88100000 |
| H | -2.40600000 | 3.08800000  | -4.01700000 |
| C | 0.82200000  | 1.09500000  | -3.79600000 |
| C | 1.91600000  | 2.10100000  | -3.82300000 |
| C | 1.66000000  | 3.45600000  | -4.02100000 |
| H | 0.65500000  | 3.81200000  | -4.19800000 |
| C | 2.70400000  | 4.35300000  | -4.00100000 |
| H | 2.56200000  | 5.41300000  | -4.16900000 |
| C | 4.23500000  | 2.64500000  | -3.60600000 |
| H | 5.27200000  | 2.38500000  | -3.44500000 |
| C | 3.23300000  | 1.70100000  | -3.63800000 |
| H | 3.47900000  | 0.65900000  | -3.50200000 |
| N | -0.21300000 | 1.07000000  | 3.64800000  |
| N | 4.12000000  | 3.55500000  | 3.39000000  |
| C | -4.29000000 | 2.17200000  | 3.73000000  |
| H | -4.65200000 | 3.16800000  | 3.95000000  |
| C | -2.95900000 | 1.83700000  | 3.83100000  |
| H | -2.24000000 | 2.59100000  | 4.12000000  |
| C | 1.04700000  | 0.64400000  | 3.65800000  |
| C | 2.12500000  | 1.66600000  | 3.57900000  |
| C | 1.84800000  | 2.94900000  | 3.12300000  |
| H | 0.84600000  | 3.23100000  | 2.83200000  |
| C | 2.86700000  | 3.87000000  | 3.02900000  |
| H | 2.70400000  | 4.87900000  | 2.67600000  |
| C | 4.40900000  | 2.32400000  | 3.84500000  |
| H | 5.43300000  | 2.14400000  | 4.14600000  |
| C | 3.43400000  | 1.35700000  | 3.93800000  |
| H | 3.69300000  | 0.37600000  | 4.31200000  |
| C | 5.94200000  | 5.48100000  | -0.04500000 |
| H | 6.61200000  | 6.30500000  | 0.14400000  |
| C | 5.19600000  | 5.12000000  | -1.14400000 |
| N | 4.84000000  | 3.61300000  | 0.37500000  |
| N | 4.54300000  | 3.97300000  | -0.83300000 |

|   |             |             |             |
|---|-------------|-------------|-------------|
| N | 5.68000000  | 4.52000000  | 0.86600000  |
| C | 5.00300000  | 5.82100000  | -2.44700000 |
| H | 4.05900000  | 6.37700000  | -2.43200000 |
| H | 5.78100000  | 6.57700000  | -2.57500000 |
| C | 6.20800000  | 4.34800000  | 2.20300000  |
| H | 6.65200000  | 3.35300000  | 2.27000000  |
| C | 5.05900000  | 4.94300000  | -3.69500000 |
| H | 4.98800000  | 5.56700000  | -4.58700000 |
| H | 5.99500000  | 4.38900000  | -3.74800000 |
| C | 5.19000000  | 4.57700000  | 3.31300000  |
| H | 5.71200000  | 4.57300000  | 4.27200000  |
| H | 4.70400000  | 5.54700000  | 3.20600000  |
| H | 7.01200000  | 5.07100000  | 2.34600000  |
| C | -7.32300000 | 1.62400000  | -1.20900000 |
| N | -6.24900000 | 1.02800000  | 0.57500000  |
| N | -6.42500000 | 0.75700000  | -0.67800000 |
| N | -7.02700000 | 2.06100000  | 0.87700000  |
| C | -7.76100000 | 1.51100000  | -2.63000000 |
| H | -7.90900000 | 0.45600000  | -2.87100000 |
| H | -8.74400000 | 1.97100000  | -2.75500000 |
| C | -6.87100000 | 2.18700000  | -3.66800000 |
| H | -7.26300000 | 1.99700000  | -4.67000000 |
| H | -6.85200000 | 3.26500000  | -3.51500000 |
| C | -6.64200000 | 1.64600000  | 3.30200000  |
| H | -6.89300000 | 2.09400000  | 4.26500000  |
| C | 1.82000000  | -7.82600000 | -0.23900000 |
| H | 2.10400000  | -8.86600000 | -0.19800000 |
| C | 1.90700000  | -6.87800000 | -1.23100000 |
| N | 0.98700000  | -5.91000000 | 0.47600000  |
| N | 1.38800000  | -5.72300000 | -0.74200000 |
| N | 1.25100000  | -7.17600000 | 0.79600000  |
| C | 2.49100000  | -6.98500000 | -2.59800000 |
| H | 3.40700000  | -6.38800000 | -2.65900000 |
| H | 2.80200000  | -8.01600000 | -2.78100000 |
| C | 1.55800000  | -6.61400000 | -3.74800000 |
| H | 2.04200000  | -6.82800000 | -4.70300000 |
| H | 0.63100000  | -7.18300000 | -3.70800000 |
| C | 1.62300000  | -7.07000000 | 3.26200000  |
| H | 1.34200000  | -7.58900000 | 4.18000000  |
| C | -7.72100000 | 2.47500000  | -0.20200000 |
| H | -8.43300000 | 3.28500000  | -0.16800000 |
| H | 2.70000000  | -7.17700000 | 3.13500000  |
| C | 0.86400000  | -7.68800000 | 2.09400000  |
| H | 1.06100000  | -8.76100000 | 2.10800000  |
| H | -0.21300000 | -7.55600000 | 2.21200000  |
| H | -7.22000000 | 0.72900000  | 3.20000000  |
| C | -6.99800000 | 2.63800000  | 2.20900000  |
| H | -7.99700000 | 3.01600000  | 2.43500000  |
| H | -6.32100000 | 3.49700000  | 2.21600000  |
| C | -1.61500000 | 0.65800000  | 0.45200000  |
| C | -0.86400000 | -0.53200000 | 0.51900000  |

|   |             |             |             |
|---|-------------|-------------|-------------|
| C | -0.71600000 | 1.73900000  | 0.39500000  |
| C | 0.50000000  | -0.18700000 | 0.49600000  |
| C | 0.59100000  | 1.21600000  | 0.41600000  |
| C | -2.89500000 | 0.71200000  | -0.04500000 |
| C | -1.34000000 | -1.75400000 | 0.10600000  |
| C | -1.03200000 | 2.95500000  | -0.16100000 |
| C | 1.48700000  | -1.03500000 | 0.05200000  |
| C | 1.67500000  | 1.87200000  | -0.11500000 |
| C | 1.03400000  | -2.38200000 | -0.17900000 |
| C | -0.30600000 | -2.72300000 | -0.14600000 |
| C | -2.42600000 | 3.10100000  | -0.48900000 |
| C | -3.30700000 | 2.03700000  | -0.43400000 |
| C | 0.11500000  | 3.74400000  | -0.53100000 |
| C | 1.39800000  | 3.23000000  | -0.50900000 |
| C | 2.71200000  | -0.36400000 | -0.30300000 |
| C | 2.80400000  | 1.01400000  | -0.37700000 |
| C | -3.48300000 | -0.58200000 | -0.28800000 |
| C | -2.74500000 | -1.75000000 | -0.21400000 |
| H | 1.73500000  | -3.16100000 | -0.45900000 |
| H | -2.78900000 | 4.05300000  | -0.86300000 |
| H | -0.56500000 | -3.74900000 | -0.38700000 |
| H | -4.32400000 | 2.19600000  | -0.77000000 |
| H | -0.03000000 | 4.75100000  | -0.90900000 |
| H | 3.58100000  | -0.94900000 | -0.58800000 |
| H | 2.21600000  | 3.84300000  | -0.86600000 |
| H | 3.73800000  | 1.45800000  | -0.69700000 |
| H | -4.52100000 | -0.63900000 | -0.59800000 |
| H | -3.23900000 | -2.68100000 | -0.47700000 |

### **G7cH [+6]**

|   |             |             |             |
|---|-------------|-------------|-------------|
| N | -5.54800000 | 1.11300000  | -3.21900000 |
| N | -1.15800000 | -1.20800000 | -3.69800000 |
| N | 1.08200000  | -0.57900000 | -4.03100000 |
| N | 1.30300000  | -5.55100000 | -3.98000000 |
| C | -5.20800000 | -0.13800000 | -3.56900000 |
| H | -6.02200000 | -0.82900000 | -3.75200000 |
| C | -3.88900000 | -0.50100000 | -3.70200000 |
| H | -3.64200000 | -1.51200000 | -3.99500000 |
| C | -2.89000000 | 0.44700000  | -3.49100000 |
| C | -1.46000000 | 0.08600000  | -3.66300000 |
| C | 0.12800000  | -1.48900000 | -3.88200000 |
| C | 0.53100000  | -2.91500000 | -3.93100000 |
| C | -0.33200000 | -3.91500000 | -3.50200000 |
| H | -1.32200000 | -3.67300000 | -3.14000000 |
| C | 0.08600000  | -5.22600000 | -3.52600000 |
| H | -0.53700000 | -6.04300000 | -3.19000000 |
| C | 2.14100000  | -4.60600000 | -4.43500000 |
| H | 3.09400000  | -4.94800000 | -4.81800000 |
| C | 1.78500000  | -3.27900000 | -4.41400000 |
| H | 2.47400000  | -2.53500000 | -4.78700000 |



|   |             |             |             |
|---|-------------|-------------|-------------|
| N | -4.62100000 | 1.39300000  | 3.70900000  |
| N | -0.27200000 | -0.95600000 | 3.17600000  |
| N | 1.98400000  | -0.38700000 | 2.83600000  |
| N | 2.02100000  | -5.37700000 | 3.11900000  |
| C | -4.28400000 | 0.11700000  | 3.47100000  |
| H | -5.09300000 | -0.60000000 | 3.43600000  |
| C | -2.97100000 | -0.24400000 | 3.28600000  |
| H | -2.72200000 | -1.28000000 | 3.10700000  |
| C | -1.97800000 | 0.72800000  | 3.32200000  |
| C | -0.55500000 | 0.34200000  | 3.12500000  |
| C | 1.00800000  | -1.27000000 | 3.02100000  |
| C | 1.37100000  | -2.70800000 | 3.07000000  |
| C | 0.47900000  | -3.64700000 | 3.58100000  |
| H | -0.48100000 | -3.34600000 | 3.97500000  |
| C | 0.83400000  | -4.97500000 | 3.60200000  |
| H | 0.18700000  | -5.74300000 | 4.00600000  |
| C | 2.90200000  | -4.48900000 | 2.63900000  |
| H | 3.84100000  | -4.88500000 | 2.27800000  |
| C | 2.60900000  | -3.14400000 | 2.61500000  |
| H | 3.33500000  | -2.44300000 | 2.23000000  |
| N | -0.57600000 | 1.07300000  | -3.79000000 |
| N | 3.70500000  | 3.61600000  | -4.46500000 |
| C | -4.60400000 | 2.03800000  | -3.00400000 |
| H | -4.95000000 | 3.02600000  | -2.73200000 |
| C | -3.26700000 | 1.73800000  | -3.14300000 |
| H | -2.52800000 | 2.51000000  | -2.97900000 |
| C | 0.68300000  | 0.68800000  | -3.97800000 |
| C | 1.72900000  | 1.72800000  | -4.15300000 |
| C | 1.40500000  | 3.05700000  | -4.40300000 |
| H | 0.37500000  | 3.37500000  | -4.48700000 |
| C | 2.41600000  | 3.97800000  | -4.56600000 |
| H | 2.22200000  | 5.01900000  | -4.79000000 |
| C | 4.03800000  | 2.34100000  | -4.22700000 |
| H | 5.09400000  | 2.12100000  | -4.16100000 |
| C | 3.07100000  | 1.37400000  | -4.08100000 |
| H | 3.36200000  | 0.34900000  | -3.90300000 |
| N | 0.34400000  | 1.30200000  | 2.93300000  |
| N | 4.62700000  | 3.82900000  | 2.39300000  |
| C | -3.67900000 | 2.34700000  | 3.77100000  |
| H | -4.01600000 | 3.35100000  | 3.99400000  |
| C | -2.35000000 | 2.04600000  | 3.56900000  |
| H | -1.61200000 | 2.83400000  | 3.62200000  |
| C | 1.60200000  | 0.88600000  | 2.80100000  |
| C | 2.66100000  | 1.91400000  | 2.63400000  |
| C | 2.34200000  | 3.21900000  | 2.27900000  |
| H | 1.31800000  | 3.51300000  | 2.09400000  |
| C | 3.34700000  | 4.15300000  | 2.15900000  |
| H | 3.14800000  | 5.18000000  | 1.88600000  |
| C | 4.96000000  | 2.57400000  | 2.74000000  |
| H | 6.00700000  | 2.38300000  | 2.93500000  |
| C | 4.00000000  | 1.59700000  | 2.85900000  |

|   |             |             |             |
|---|-------------|-------------|-------------|
| H | 4.29200000  | 0.59800000  | 3.15100000  |
| C | 5.99900000  | 5.59400000  | -1.10600000 |
| H | 6.46700000  | 6.55800000  | -0.98300000 |
| C | 5.29500000  | 5.02400000  | -2.14300000 |
| N | 5.42700000  | 3.52600000  | -0.58100000 |
| N | 4.97500000  | 3.76100000  | -1.77100000 |
| N | 6.04500000  | 4.62800000  | -0.16600000 |
| C | 4.86700000  | 5.61300000  | -3.44800000 |
| H | 3.91200000  | 6.13600000  | -3.33000000 |
| H | 5.58000000  | 6.38300000  | -3.75300000 |
| C | 6.66200000  | 4.63300000  | 1.14200000  |
| H | 7.19800000  | 3.69000000  | 1.25900000  |
| C | 4.77400000  | 4.63700000  | -4.61300000 |
| H | 4.56400000  | 5.18300000  | -5.53400000 |
| H | 5.70900000  | 4.09500000  | -4.75200000 |
| C | 5.68000000  | 4.86500000  | 2.28400000  |
| H | 6.23000000  | 4.88000000  | 3.22800000  |
| H | 5.17500000  | 5.82500000  | 2.17900000  |
| H | 7.40400000  | 5.43300000  | 1.17900000  |
| C | -7.07200000 | 1.19100000  | -0.54100000 |
| N | -5.55900000 | 1.30400000  | 1.00000000  |
| N | -5.80000000 | 0.87300000  | -0.19600000 |
| N | -6.66300000 | 1.89000000  | 1.45400000  |
| C | -7.64500000 | 0.80300000  | -1.86000000 |
| H | -7.61600000 | -0.28500000 | -1.96500000 |
| H | -8.70100000 | 1.07800000  | -1.90300000 |
| C | -6.98200000 | 1.46100000  | -3.06900000 |
| H | -7.48600000 | 1.14900000  | -3.98500000 |
| H | -7.03900000 | 2.54700000  | -3.01000000 |
| C | -6.05200000 | 1.74500000  | 3.87100000  |
| H | -6.14900000 | 2.31600000  | 4.79700000  |
| C | 2.29300000  | -7.84800000 | -0.38400000 |
| H | 2.57900000  | -8.88500000 | -0.28900000 |
| C | 2.31900000  | -6.97200000 | -1.44200000 |
| N | 1.51500000  | -5.88100000 | 0.25000000  |
| N | 1.83800000  | -5.78000000 | -1.00100000 |
| N | 1.79600000  | -7.12600000 | 0.63900000  |
| C | 2.80400000  | -7.18500000 | -2.83500000 |
| H | 3.67900000  | -6.55500000 | -3.02300000 |
| H | 3.15100000  | -8.21500000 | -2.94700000 |
| C | 1.76500000  | -6.95700000 | -3.93100000 |
| H | 2.19000000  | -7.19500000 | -4.90700000 |
| H | 0.88500000  | -7.58100000 | -3.78500000 |
| C | 2.32300000  | -6.82200000 | 3.05400000  |
| H | 2.10300000  | -7.25600000 | 4.03200000  |
| C | -7.64000000 | 1.85300000  | 0.52500000  |
| H | -8.62200000 | 2.27200000  | 0.68500000  |
| H | 3.39200000  | -6.92800000 | 2.87300000  |
| C | 1.50500000  | -7.54800000 | 1.99300000  |
| H | 1.73100000  | -8.61200000 | 2.07300000  |
| H | 0.43500000  | -7.43000000 | 2.17300000  |

|   |             |             |             |
|---|-------------|-------------|-------------|
| H | -6.60100000 | 0.81300000  | 3.99600000  |
| C | -6.63200000 | 2.57300000  | 2.73300000  |
| H | -7.65700000 | 2.82500000  | 3.01000000  |
| H | -6.09000000 | 3.51600000  | 2.61800000  |
| C | -1.74100000 | -2.03800000 | -0.12000000 |
| C | -0.44500000 | -2.46100000 | -0.25700000 |
| C | 0.59200000  | -1.51900000 | -0.42800000 |
| C | 0.28600000  | -0.12700000 | -0.42900000 |
| C | -1.06200000 | 0.29300000  | -0.24300000 |
| C | -2.04800000 | -0.67200000 | -0.11900000 |
| H | 2.13900000  | -3.00400000 | -0.62700000 |
| H | -2.54200000 | -2.76100000 | -0.01000000 |
| H | -0.19200000 | -3.51600000 | -0.24500000 |
| C | 1.92800000  | -1.94000000 | -0.60200000 |
| C | 1.33300000  | 0.82000000  | -0.61900000 |
| H | -3.08600000 | -0.37900000 | -0.02200000 |
| C | 2.63200000  | 0.35600000  | -0.74600000 |
| C | 2.92700000  | -1.01200000 | -0.74400000 |
| H | 3.45100000  | 1.05700000  | -0.85500000 |
| H | 3.95600000  | -1.33200000 | -0.86500000 |
| C | -2.63100000 | 2.19400000  | 0.09000000  |
| C | -1.36300000 | 1.72600000  | -0.18900000 |
| C | -0.32800000 | 2.66700000  | -0.43600000 |
| C | -0.63500000 | 4.05800000  | -0.43900000 |
| C | -1.95200000 | 4.48400000  | -0.16500000 |
| C | -2.92600000 | 3.56100000  | 0.10500000  |
| H | -3.43300000 | 1.50500000  | 0.30300000  |
| C | 1.00600000  | 2.24600000  | -0.68300000 |
| C | 0.38200000  | 4.99600000  | -0.72000000 |
| H | -2.17400000 | 5.54500000  | -0.16800000 |
| H | -3.93800000 | 3.88400000  | 0.32300000  |
| C | 1.65200000  | 4.56600000  | -0.99400000 |
| C | 1.95900000  | 3.20000000  | -0.97500000 |
| H | 0.13600000  | 6.05200000  | -0.72400000 |
| H | 2.43400000  | 5.28100000  | -1.22500000 |
| H | 2.97500000  | 2.91400000  | -1.20400000 |
